# Supplementary material for: Modulation of electronic and redox properties in phenolate-rich cobalt(iii) complexes and their implications for catalytic proton reduction
Source: Royal Society of Chemistry journal article supplement (doi:10.1039/c4dt03337j), 2015-01-01
Supplement: c4dt03337j1.pdf [file c4dt03337j1.pdf]

## Supporting Information

### Modulation of Electronic and Redox Properties in Phenolate-rich Cobalt(III) Complexes and their Implications for Catalytic Proton Reduction

Debashis Basu,<sup>a</sup> Marco M. Allard,<sup>a,b</sup> Fernando R. Xavier,<sup>a,c</sup> Mary Jane Heeg,<sup>a</sup>

H. Bernhard Schlegel,<sup>a</sup> Claudio N. Verani<sup>a,\*</sup>

<sup>a</sup>Department of Chemistry, Wayne State University - Detroit, MI 48202

#### Table of Contents

**Figure S1.** Synthesis of precursors and ligands

**Figure S2.** Synthesis of the cobalt(III) complexes

**Figure S3.** Experimental and simulated isotopic distribution for **1-3**

**Figure S4.** Full scale <sup>1</sup>H-NMR spectra of [Co<sup>III</sup>L<sup>Br</sup>(MeOH)] (**2**) in d<sub>6</sub>-DMSO

**Figure S5.** Full scale <sup>1</sup>H-NMR spectra of [Co<sup>III</sup>L<sup>I</sup>(MeOH)] (**3**) in d<sub>6</sub>-DMSO

**Figure S6.** Fully conjugated structure of phenolate-imine-diamino aromatic ring system

**Figure S7.** MO ladder for **2**

**Figure S8.** UV-Visible Spectra of **1-4** ([C] = 1.0 × 10<sup>-4</sup> M) in dichloromethane

**Figure S9.** Comparison of UV-Visible spectra for **1** and **4** in different solvents

**Figure S10.** Absorption spectra: calculated vs experimental for **4**

**Table S1.** TD-DFT calculated transitions and assignments for [CoL -Cl]<sup>0</sup> parent complex (**1**)

**Table S2.** TD-DFT calculated transitions and assignments for [CoL -CH<sub>3</sub>]<sup>0</sup> parent complex (**4**)

**Figure S11.** Cyclic voltammograms for **2** in acetonitrile

**Figure S12.** Cyclic voltammogram for **3** in *N,N'*-dimethylformamide

**Figure S13.** Cyclic voltammetry of **1** and **4** in DCM and ACN

**Table S3.** Cyclic voltammetry parameters in dichloromethane

**Table S4.** Calculated redox potentials

**Figure S14.** Calculated and experimental correlation between redox potentials

**Figure S15.** Redox sequence for **4**

**Figure S16.** Spectral changes upon electrochemical reduction of complexes **1, 2, 3** and **4**

**Figure S17.** Spectral changes for **1, 2, 3,** and **4** upon electrochemical oxidation

**Figure S18.** Computed electronic spectra for **1** after 1<sup>st</sup> reduction and after 1<sup>st</sup> oxidation

**Figure S19.** TD-DFT for spectroelectrochemical changes

**Figure S20.** Time-tracked UV-Visible spectral changes for complexes **1 – 4**

**Figure S21.** Chemical reduction tests for the complexes **1 – 4** towards the reductant ascorbic acid

**Figure S22.** Electrocatalytic activity of **4** towards proton reduction with acetic acid (HOAc)

**Figure S23.** Cyclic voltammogram for blank in the presence of HOAc

**Figure S24.** UV-Visible spectra of the solution before and after bulk-electrolysis in presence of HOAc

**Table S5.** Cartesian coordinates for DFT calculations

**Figure S1.** Synthesis of precursors and ligands

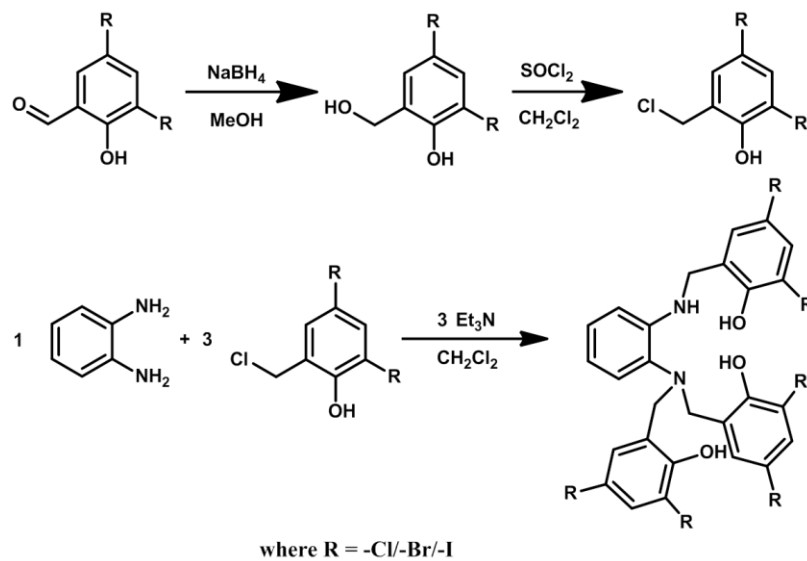

**Figure S2.** Synthesis of the cobalt(III) complexes

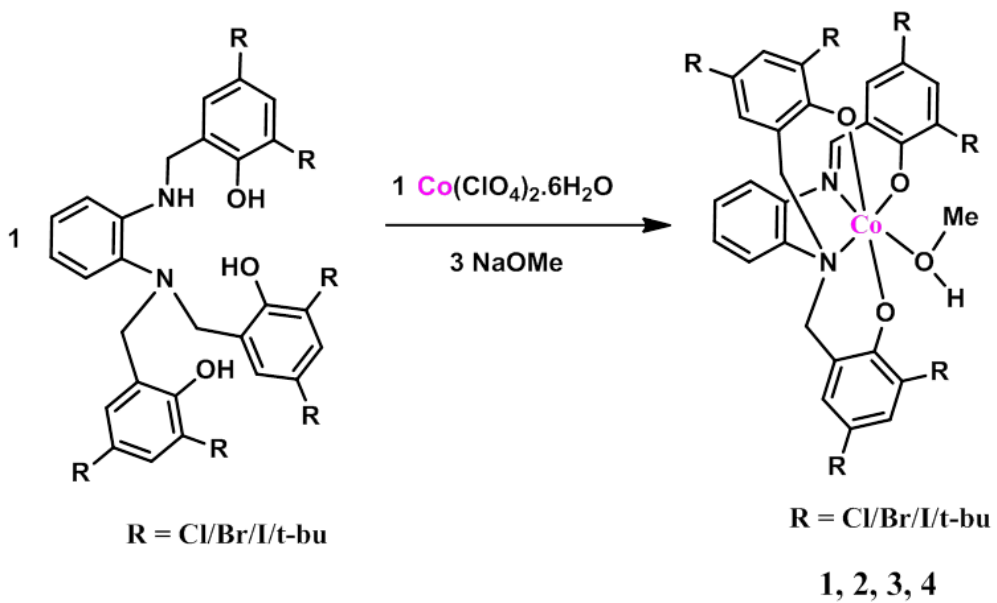

**Figure S3.** Experimental (bars) and simulated (line) isotopic distribution for the molecular ions of complexes **1-3** (left to right)

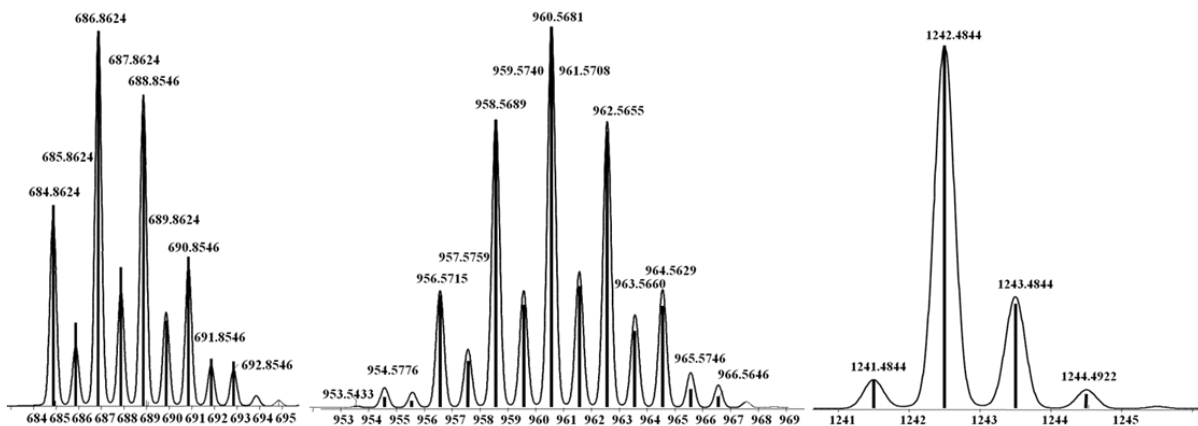

**Figure S4.** Full scale  $^1\text{H-NMR}$  spectra of  $[\text{Co}^{\text{III}}\text{L}^{\text{Br}}(\text{MeOH})]$  (**2**) in  $\text{d}_6\text{-DMSO}$

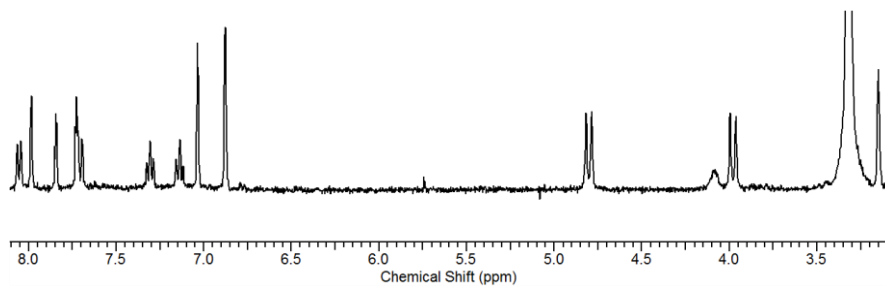

**Figure S5.** Full scale  $^1\text{H-NMR}$  spectra of  $[\text{Co}^{\text{III}}\text{L}^{\text{I}}(\text{MeOH})]$  (**3**) in  $\text{d}_6\text{-DMSO}$

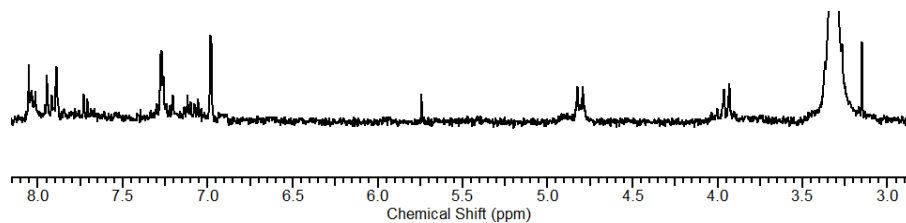

**Figure S6.** Fully conjugated structure of phelonate-imine-diamino aromatic ring system

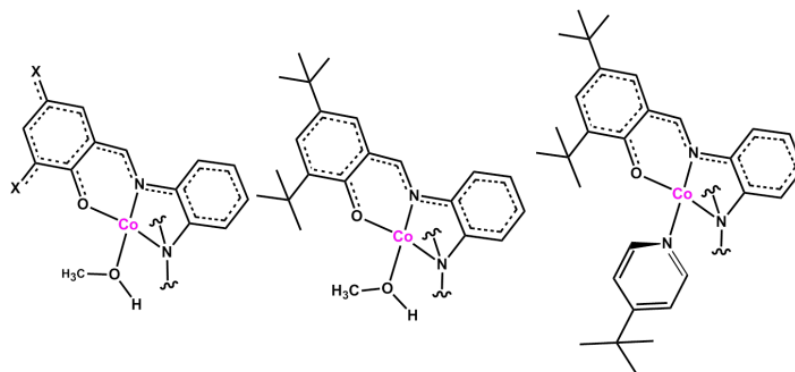

Where X = -Cl/-Br/-I; Partial structure used for simplicity

**Figure S7.** MO ladder for 2

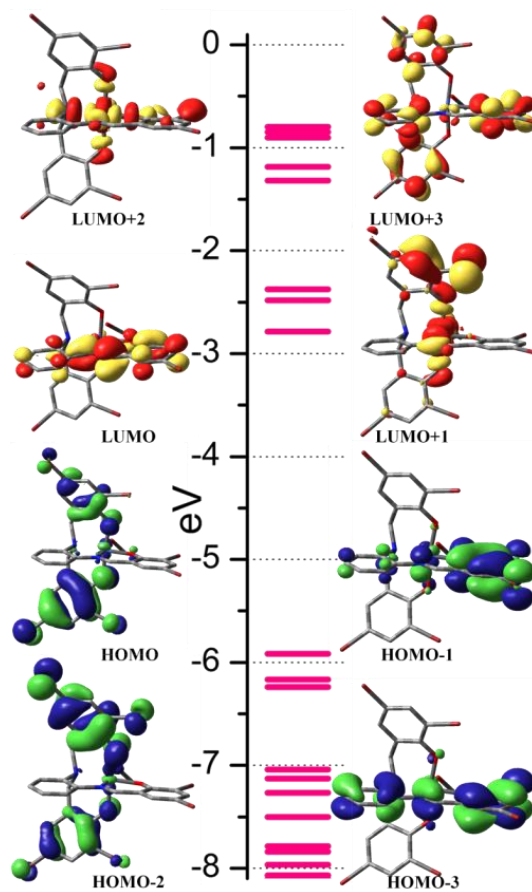

**Figure S8.** UV-Visible spectra of **1-4** ( $[C] = 1.0 \times 10^{-4}$  M) in dichloromethane

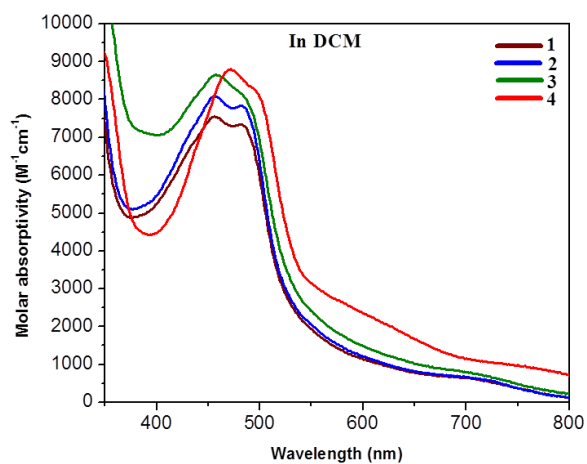

**Figure S9.** Comparison of UV-Visible spectra for **1** and **4** in different solvents (acetonitrile, dichloromethane, dimethyl formamide and pyridine)

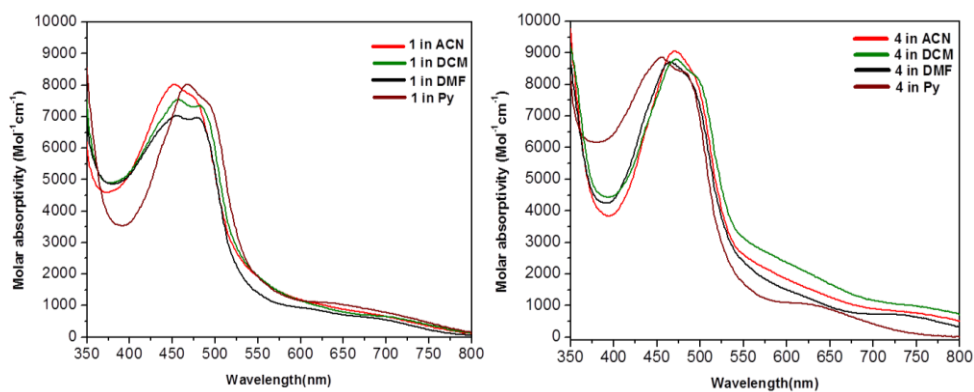

**Figure S10.** Absorption spectra: calculated vs experimental for **4** (B3PW91/6-311+g(d,p) (acetonitrile))

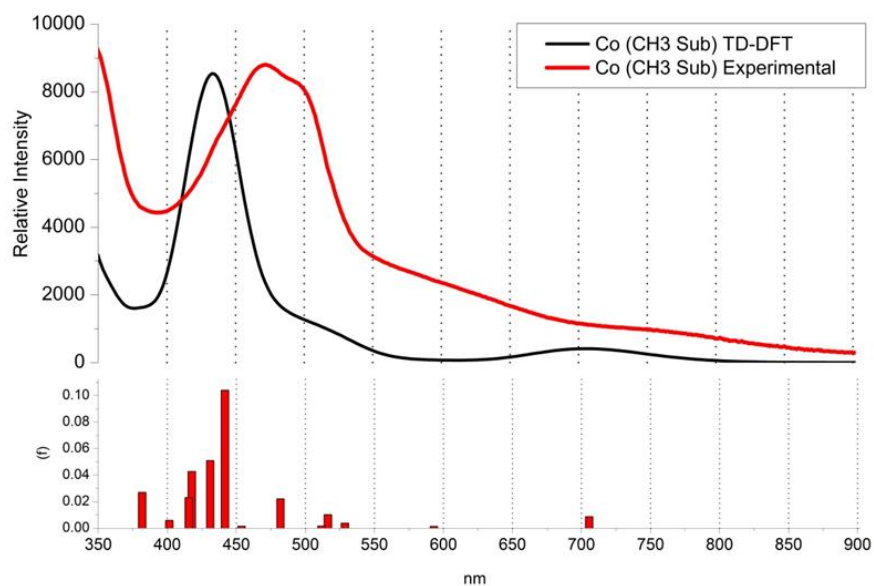

**Table S1.** TD-DFT calculated transitions and assignments for [CoL –Cl]<sup>0</sup> parent complex (**1**)

| #  | nm    | cm-1<br>(/1000) | (f)    | Assignment                                                  | Transition Type                            |
|----|-------|-----------------|--------|-------------------------------------------------------------|--------------------------------------------|
| 1  | 682.8 | 14.6            | 0.0086 | H-0->L+1(+33%) H-6->L+1(+14%) H-1->L+1(12%) H-10->L+1(+12%) | Amino-Phenol --> Cobalt<br>(LMCT)          |
| 2  | 584.9 | 17.1            | 0.0038 | H-6->L+2(+28%) H-1->L+2(26%) H-22->L+2(7%) H-12->L+2(7%)    | phenol/cobalt --> Cobalt                   |
| 3  | 512.1 | 19.5            | 0.0082 | H-0->L+2(+21%) H-10->L+2(+8%) H-0->L+0(8%) H-11->L+1(+6%)   | Amino-Phenol --> Cobalt<br>(LMCT)          |
| 4  | 506.9 | 19.7            | 0.0035 | H-0->L+2(+33%) H-0->L+0(16%) H-11->L+2(+8%) H-9->L+2(+7%)   | Amino-Phenol --> Cobalt<br>(LMCT)          |
| 5  | 487.2 | 20.5            | 0.0157 | H-0->L+0(+73%) H-0->L+2(+15%)                               | Amino-Phenol --> Phenylene<br>Imine (LLCT) |
| 6  | 471.5 | 21.2            | 0.0136 | H-1->L+1(+34%) H-0->L+1(+21%) H-1->L+0(+9%) H-0->L+2(8%)    | Imino-Phenol --> Cobalt<br>(LMCT)          |
| 7  | 436.6 | 22.9            | 0.0991 | H-1->L+0(+69%) H-2->L+0(16%)                                | Imino-Phenol --> Phenylene<br>Imine (LLCT) |
| 8  | 432.9 | 23.1            | 0.0377 | H-2->L+0(+79%) H-1->L+0(+15%)                               | Amino-Phenol --> Phenylene<br>Imine (LLCT) |
| 9  | 414   | 24.2            | 0.027  | H-2->L+1(+28%) H-1->L+2(19%) H-10->L+1(+11%) H-0->L+1(10%)  | Amino-Phenol --> Cobalt<br>(LMCT)          |
| 10 | 410.8 | 24.3            | 0.0338 | H-2->L+1(+40%) H-2->L+2(19%) H-1->L+2(+16%)                 | Amino-Phenol --> Cobalt<br>(LMCT)          |
| 11 | 406.1 | 24.6            | 0.0123 | H-2->L+2(+63%) H-2->L+1(+18%)                               | Amino-Phenol --> Cobalt<br>(LMCT)          |

|    |       |      |        |                                                             |                                |
|----|-------|------|--------|-------------------------------------------------------------|--------------------------------|
| 12 | 393.9 | 25.4 | 0.028  | H-1->L+2(+17%) H-10->L+1(+15%) H-0->L+1(12%) H-10->L+2(10%) | Imino-Phenol --> Cobalt (LMCT) |
| 13 | 375.3 | 26.6 | 0.0388 | H-6->L+1(+38%) H-1->L+1(+24%)                               | phenol/cobalt --> Cobalt       |
|    |       |      |        | (B3PW91/6-311+g(d,p) (acetonitrile))                        |                                |

**Table S2.** TD-DFT calculated transitions and assignments for  $[\text{CoL}-\text{CH}_3]^0$  parent complex (**4**)

| <b>-CH3 Sub Parent Compound</b> |       |              |        |                                                              |                                         |
|---------------------------------|-------|--------------|--------|--------------------------------------------------------------|-----------------------------------------|
| #                               | nm    | cm-1 (/1000) | (f)    | Assignment                                                   | Transition Type                         |
| <b>1</b>                        | 705.5 | 14.2         | 0.0087 | H-0->L+1(+36%) H-10->L+1(11%) H-4->L+1(+8%) H-6->L+1(+7%)    | Amino-Phenol --> Cobalt (LMCT)          |
| <b>2</b>                        | 593   | 16.9         | 0.0013 | H-6->L+2(+25%) H-12->L+2(16%) H-2->L+2(13%) H-1->L+2(+12%)   | phenol/cobalt --> Cobalt                |
| <b>3</b>                        | 528.6 | 18.9         | 0.0037 | H-0->L+0(+67%) H-0->L+2(18%) H-10->L+2(+7%)                  | Amino-Phenol --> Phenylene Imine (LLCT) |
| <b>4</b>                        | 516.3 | 19.4         | 0.0103 | H-0->L+2(+34%) H-0->L+0(+29%) H-10->L+2(11%)                 | Amino-Phenol --> Cobalt (LMCT)          |
| <b>5</b>                        | 511.6 | 19.5         | 0.0017 | H-11->L+1(+17%) H-7->L+1(14%) H-13->L+1(+14%) H-0->L+2(+13%) | phenol/cobalt --> Cobalt                |
| <b>6</b>                        | 481.9 | 20.8         | 0.0222 | H-1->L+1(+28%) H-2->L+1(25%) H-0->L+1(24%) H-6->L+1(+8%)     | Imino-Phenol --> Cobalt (LMCT)          |
| <b>7</b>                        | 453.7 | 22           | 0.0015 | H-1->L+0(+48%)                                               | Imino-Phenol --> Phenylene Imine (LLCT) |
| <b>8</b>                        | 441.7 | 22.6         | 0.1041 | H-2->L+0(+47%) H-1->L+0(35%) H-2->L+1(10%)                   | Phenol --> Phenylene Imine (LMCT)       |
| <b>9</b>                        | 431   | 23.2         | 0.0511 | H-1->L+1(+39%) H-2->L+1(+29%) H-1->L+0(12%) H-2->L+2(8%)     | Imino-Phenol --> Cobalt (LMCT)          |
| <b>10</b>                       | 417.7 | 23.9         | 0.0428 | H-1->L+2(+22%) H-10->L+1(19%) H-0->L+1(17%) H-0->L+2(8%)     | Imino-Phenol --> Cobalt (LMCT)          |
| <b>11</b>                       | 415.5 | 24.1         | 0.0231 | H-1->L+2(+37%) H-2->L+2(+37%) H-1-                           | Imino-Phenol --> Cobalt                 |

|                                      |       |      |       |                                                            |                                |
|--------------------------------------|-------|------|-------|------------------------------------------------------------|--------------------------------|
|                                      |       |      |       | >L+1(+10%) H-2->L+1(+5%)                                   | (LMCT)                         |
| <b>12</b>                            | 401.4 | 24.9 | 0.006 | H-2->L+2(+25%) H-10->L+1(17%) H-1->L+2(12%) H-10->L+2(+8%) | Amino-Phenol --> Cobalt (LMCT) |
| <b>13</b>                            | 381.7 | 26.2 | 0.027 | H-6->L+1(+41%) H-2->L+1(+21%) H-1->L+1(11%) H-4->L+1(+7%)  | phenol/cobalt --> Cobalt       |
| (B3PW91/6-311+g(d,p) (acetonitrile)) |       |      |       |                                                            |                                |

**Figure S11.** Cyclic voltammograms for **2** in acetonitrile. Conditions: 0.1 M TBAPF<sub>6</sub> as supporting electrolyte; scan rate: 100 mVs<sup>-1</sup>; Glassy carbon (working), platinum wire (counter) and Ag/AgCl (reference) in the three electrode cell

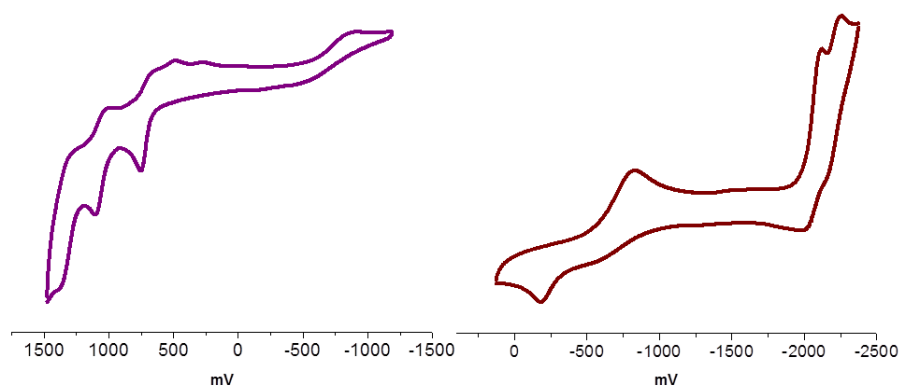

**Figure S12.** Cyclic voltammogram for **3** in *N,N'*-dimethylformamide. Conditions: 0.1 M TBAPF<sub>6</sub> as supporting electrolyte; scan rate: 100 mVs<sup>-1</sup>; Glassy carbon (working), platinum wire (counter) and Ag/AgCl (reference) in the three electrode cell

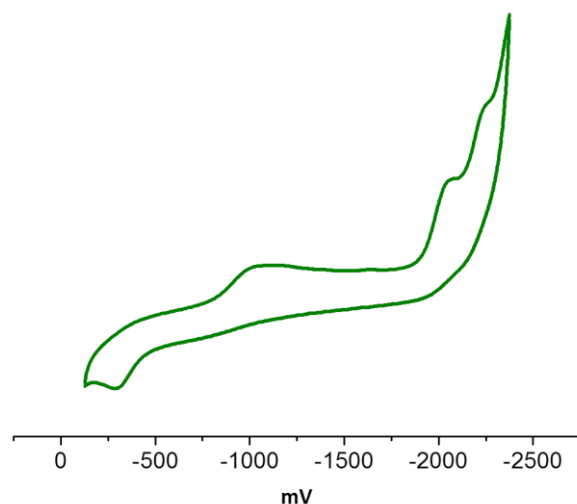



**Figure S13.** Cyclic voltammetry of **1** and **4** in DCM and ACN. Conditions:  $[C] = 1 \times 10^{-4}$  M; 0.1 M TBAPF<sub>6</sub> as supporting electrolyte; Glassy carbon (working), Pt wire (counter) and Ag/AgCl (reference); Scan rate: 100 mVs<sup>-1</sup>

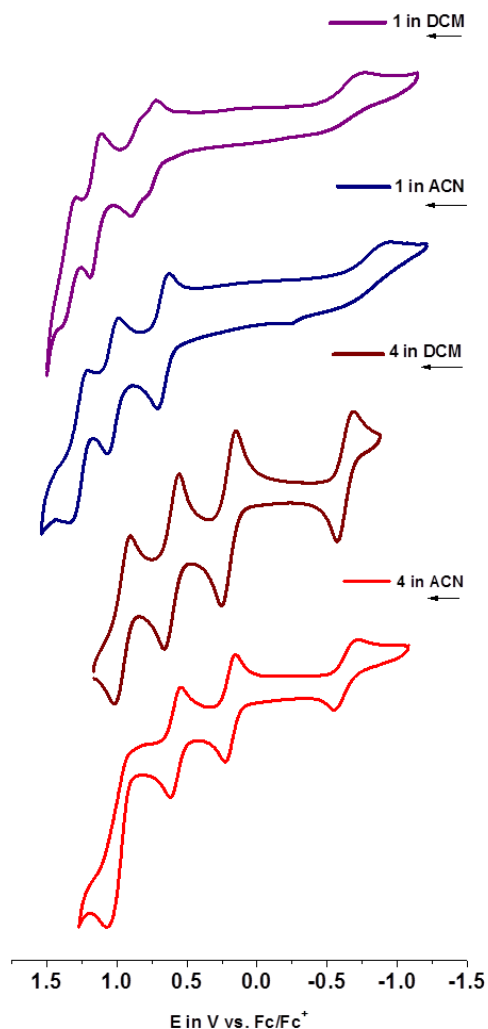

**Table S3:** Cyclic voltammetry parameters in dichloromethane

|          | 3 <sup>rd</sup> PhO <sup>-</sup> /PhO <sup>•</sup><br>$E_{1/2}$ , V<br>( $\Delta E$ , V)   $i_{pc}/i_{pa}$ | 2 <sup>nd</sup> PhO <sup>-</sup> /PhO <sup>•</sup><br>$E_{1/2}$ , V<br>( $\Delta E$ , V)   $i_{pc}/i_{pa}$ | 1 <sup>st</sup> PhO <sup>-</sup> /PhO <sup>•</sup><br>$E_{1/2}$ , V<br>( $\Delta E$ , V)   $i_{pc}/i_{pa}$ | Co(III)/Co(II)<br>$E_{1/2}$ , [ $E_{pc}$ ; $E_{pa}$ ], V<br>( $\Delta E$ , V)   $i_{pc}/i_{pa}$ | C=N/C <sup>•</sup> -N <sup>-</sup><br>$E_{1/2}$ , V<br>( $\Delta E$ , V)   $i_{pc}/i_{pa}$ |
|----------|------------------------------------------------------------------------------------------------------------|------------------------------------------------------------------------------------------------------------|------------------------------------------------------------------------------------------------------------|-------------------------------------------------------------------------------------------------|--------------------------------------------------------------------------------------------|
| <b>1</b> | +1.34 (0.10)   0.85                                                                                        | +1.16 (0.08)   0.81                                                                                        | +0.75 (0.06)   0.87  <br>+0.87 (0.07)   0.87                                                               | -0.66 [-0.69; -0.64]<br>(0.05)   1.16                                                           | -2.12 (0.04)   1.03                                                                        |
| <b>2</b> | --                                                                                                         | --                                                                                                         | --                                                                                                         | --                                                                                              | --                                                                                         |
| <b>3</b> | --                                                                                                         | --                                                                                                         | --                                                                                                         | --                                                                                              | --                                                                                         |
| <b>4</b> | +0.96 (0.11)   1.04                                                                                        | +0.61 (0.10)   1.08                                                                                        | +0.21 (0.10)   1.10                                                                                        | -0.63 [-0.68; -0.57]<br>(0.11)   0.95                                                           | -2.69 (0.03)   1.00                                                                        |

**TableS4.** Calculated redox potentials

| Phenolato -X  | Redox St.         | E(SCF)       | Thermal  | G(sol)       | del-G(sol) | Eo(DFT) (ACN)* | Eo(exp) (ACN) | Eo(err) |
|---------------|-------------------|--------------|----------|--------------|------------|----------------|---------------|---------|
|               |                   | Eh           | Eh       | Eh           | eV         |                | vs Fc/Fc+     |         |
| Cl-           | [1] <sup>0</sup>  | -5632.467057 | 0.346859 | -5632.120198 | 0.000      |                |               |         |
|               | [1] <sup>+</sup>  | -5632.259251 | 0.350422 | -5631.908829 | -5.752     | <b>0.58</b>    | 0.73          | 0.148   |
|               | [1] <sup>+2</sup> | -5632.034370 | 0.351513 | -5631.682857 | -6.149     | <b>0.98</b>    | 1.09          | 0.111   |
|               | [1] <sup>+3</sup> | -5631.801726 | 0.352348 | -5631.449378 | -6.353     | <b>1.18</b>    | 1.33          | 0.147   |
|               | [1] <sup>-1</sup> | -5632.629647 | 0.341108 | -5632.288539 | -4.581     | <b>-0.59</b>   | -0.78         | -0.191  |
|               | [1] <sup>-2</sup> | -5632.734023 | 0.334253 | -5632.399770 | -3.027     | <b>-2.14</b>   | -2.03         | 0.113   |
| CH3-          | [4] <sup>0</sup>  | -3110.926434 | 0.567177 | -3110.359257 | 0.000      |                |               |         |
|               | [4] <sup>+</sup>  | -3110.740331 | 0.572256 | -3110.168075 | -5.202     | <b>0.03</b>    | 0.19          | 0.158   |
|               | [4] <sup>+2</sup> | -3110.536371 | 0.573595 | -3109.962776 | -5.586     | <b>0.42</b>    | 0.58          | 0.164   |
|               | [4] <sup>+3</sup> | -3110.318886 | 0.574495 | -3109.744391 | -5.943     | <b>0.77</b>    | 0.99          | 0.217   |
|               | [4] <sup>-1</sup> | -3111.082231 | 0.559572 | -3110.522659 | -4.446     | <b>-0.72</b>   | -0.64         | 0.084   |
|               | [4] <sup>-2</sup> | -3111.166799 | 0.555438 | -3110.611361 | -2.414     | <b>-2.76</b>   | -2.55         | 0.206   |
| CH3- Pyridine | [5] <sup>0</sup>  | -3282.778940 | 0.632068 | -3282.146872 | 0.000      |                |               |         |
|               | [5] <sup>+</sup>  | -3282.594460 | 0.631609 | -3281.962851 | -5.007     | <b>-0.16</b>   | 0.27          | 0.433   |
|               | [5] <sup>+2</sup> | -3282.394376 | 0.631961 | -3281.762415 | -5.454     | <b>0.28</b>    | 0.65          | 0.366   |
|               | [5] <sup>+3</sup> | -3282.179682 | 0.632472 | -3281.547210 | -5.856     | <b>0.69</b>    | 1.01          | 0.324   |
|               | [5] <sup>-1</sup> | -3282.918908 | 0.621929 | -3282.296979 | -4.085     | <b>-1.09</b>   | NA            | NA      |
|               | [5] <sup>-2</sup> | -3282.996307 | 0.614937 | -3282.381370 | -2.296     | <b>-2.87</b>   | -2.57         | 0.304   |

(b3pw91/6-311+g(d,p) (solvent=acetonitrile))

\* Calculated Vs. Fc/Fc<sup>+</sup> (J. Phys. Chem. A 2010, 114, 12299–12304)

**Figure S14.** Calculated and experimental correlation between redox potentials

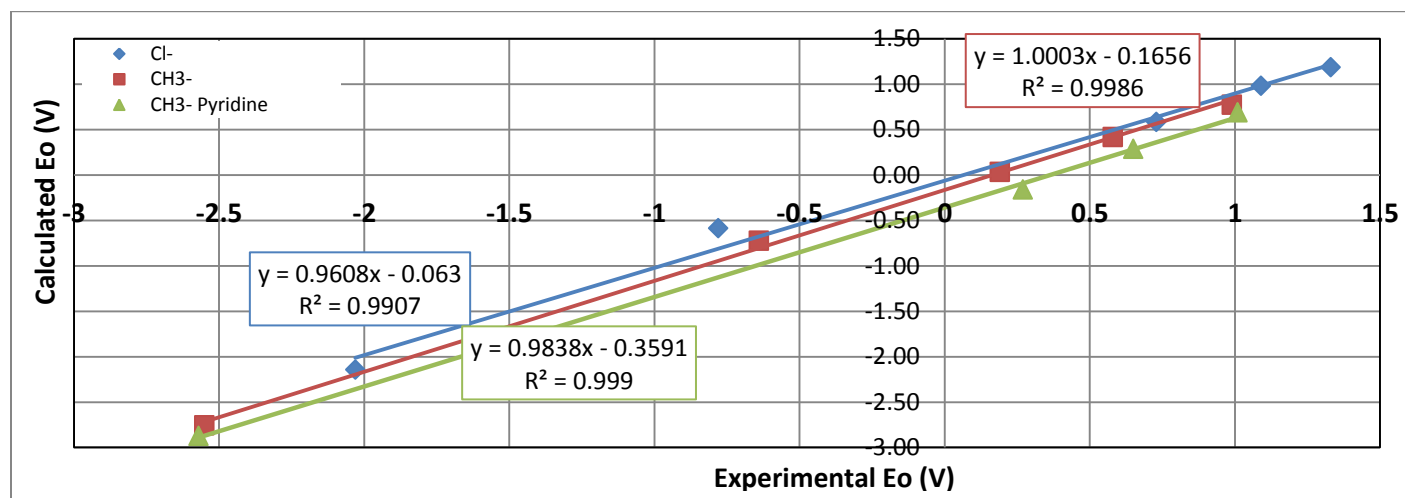

**Figure S15.** Redox sequence for **4**

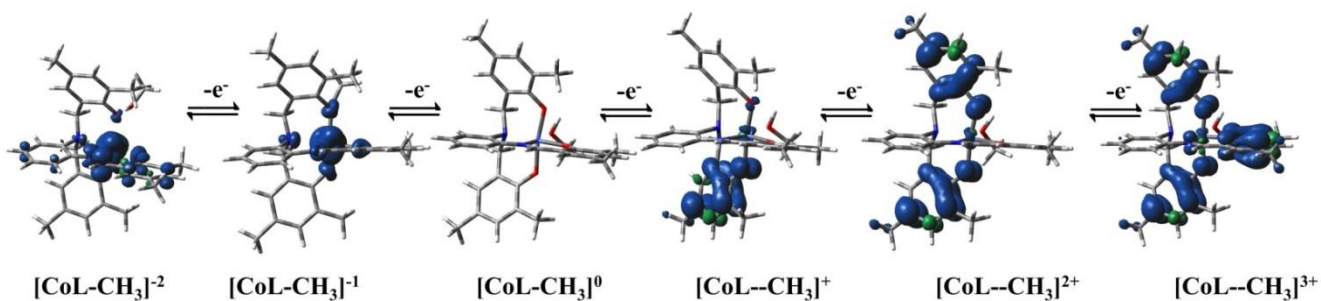

**Figure S16.** Spectral changes upon electrochemical reduction of complexes **1**, **2** and **4** in acetonitrile and **3** in *N,N'*-dimethylformamide. The applied potential was  $-2.40$  V vs.  $\text{Fc}^+/\text{Fc}$  over a period of 10 minutes and after 10 minutes (inset – for **1** - **3**).  $\text{TBAPF}_6$  (0.1 M) was used as supporting electrolyte

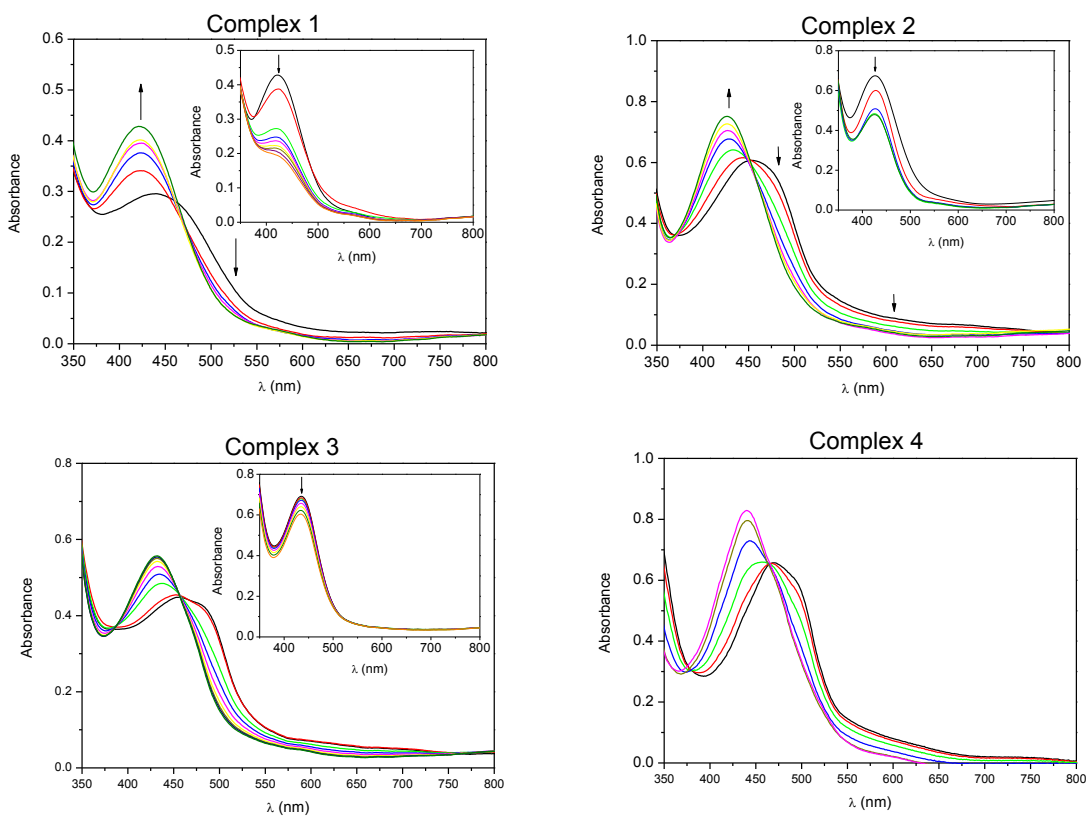

**Figure S17.** Spectral changes upon electrochemical oxidation of **1**, **2** and **4** in acetonitrile and **3** in *N, N'*-dimethylformamide. The applied potential was 0.85 V for **1-3** and 0.30 V for **4** vs.  $\text{Fc}^+/\text{Fc}$  over a period of 10 minutes.  $\text{TBAPF}_6$  (0.1 M) was used as supporting electrolyte

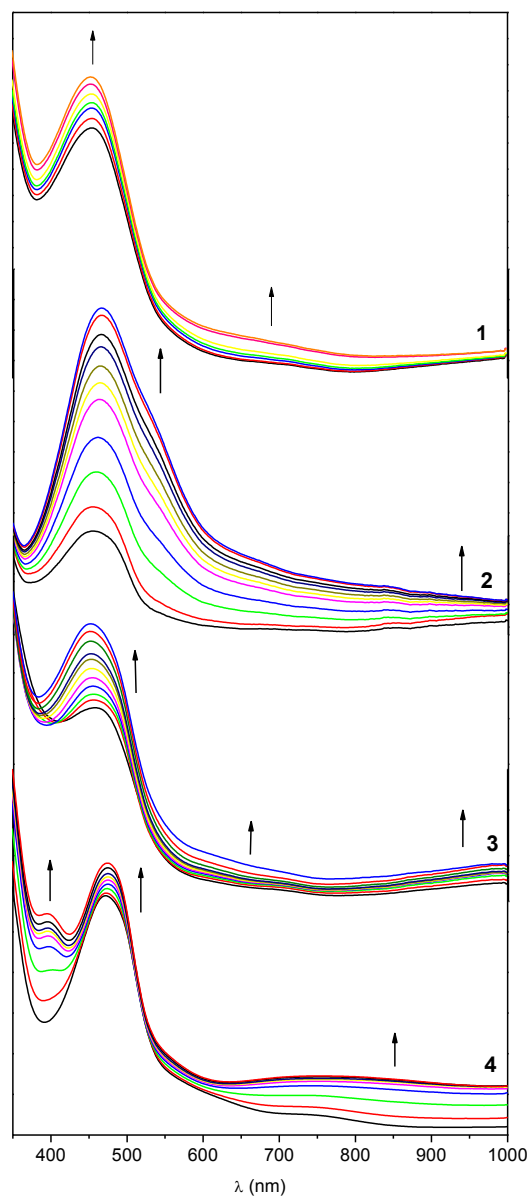

**Figure S18.** Computed electronic spectra for **1** in the parent state after 1<sup>st</sup> reduction (top) and after 1<sup>st</sup> oxidation (bottom)

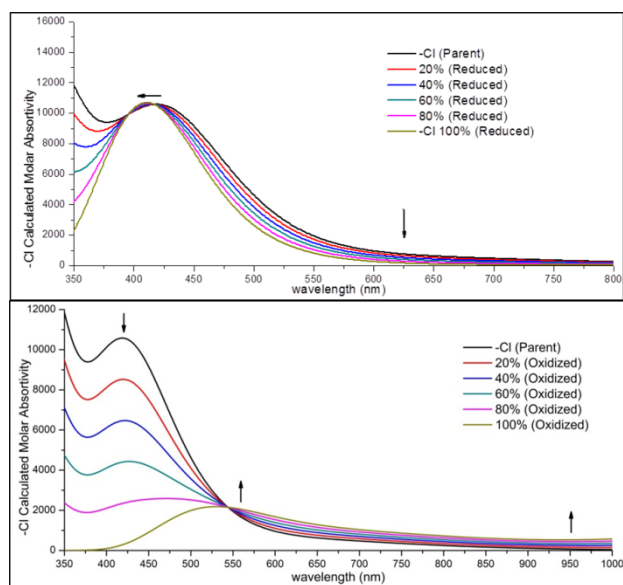

**Figure S19.** TD-DFT for spectroelectrochemical changes

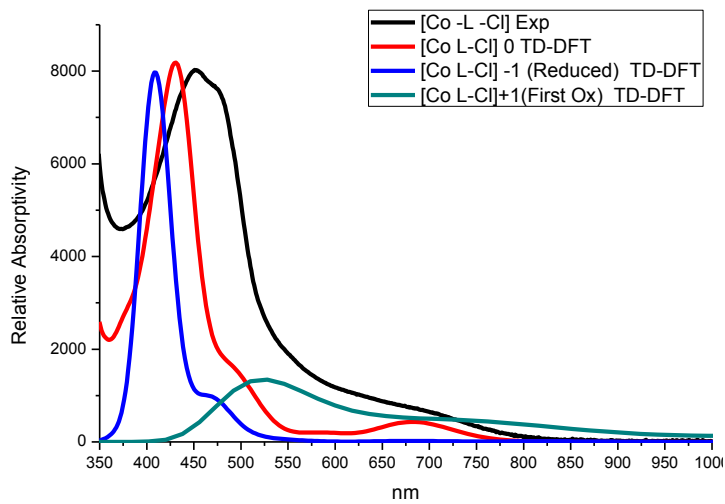

**Figure S20:** Time-tracked UV-Visible spectral change in acetonitrile/water (90:10 % v/v) for the complexes **1 – 4**. Conditions:  $[C]_{\text{final}} = 1.80 \times 10^{-4}$  M,  $[AA] = 2.00 \times 10^{-2}$  M and  $\text{pH} \sim 3.0$

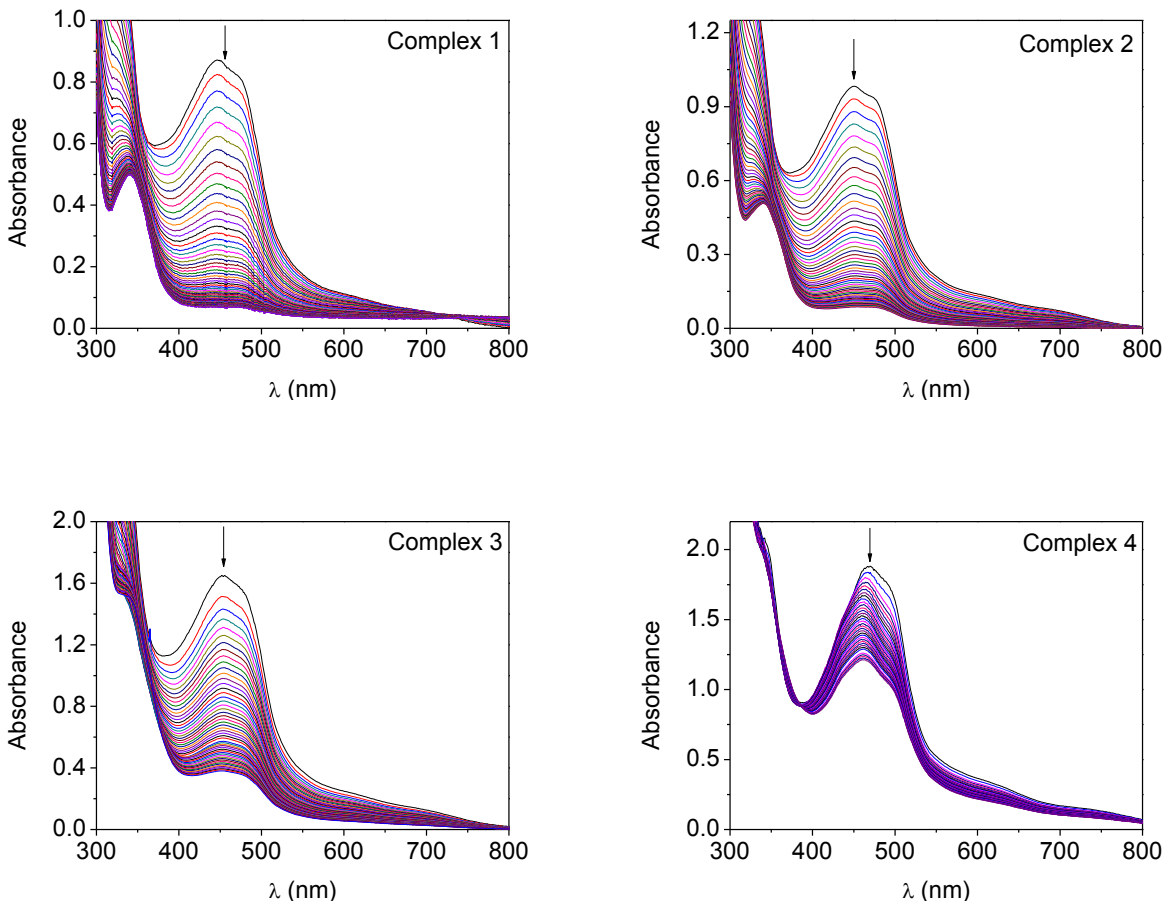

**Figure S21.** Chemical reduction tests for the complexes **1 – 4** towards the reductant (ascorbic acid).  $[\text{Complex}]$  (M) versus time (s) plot fitted as a first order exponential decaying equation

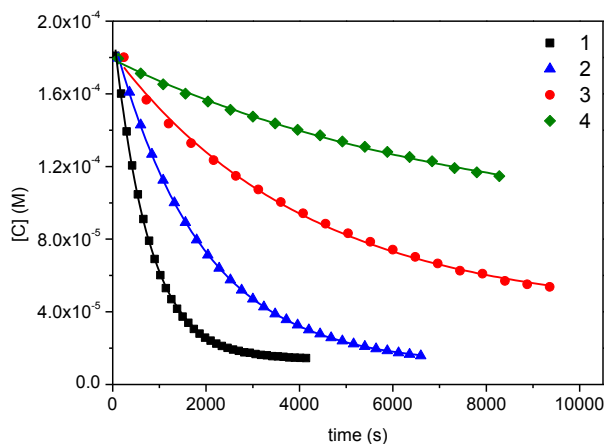

**Figure S22.** Electrocatalytic activity of **4** towards proton reduction in presence of acetic acid (HOAc)

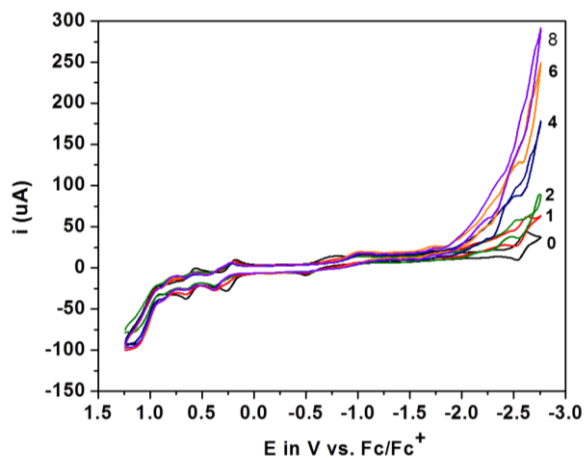

**Figure S23.** Cyclic voltammogram for blank in the presence of HOAc

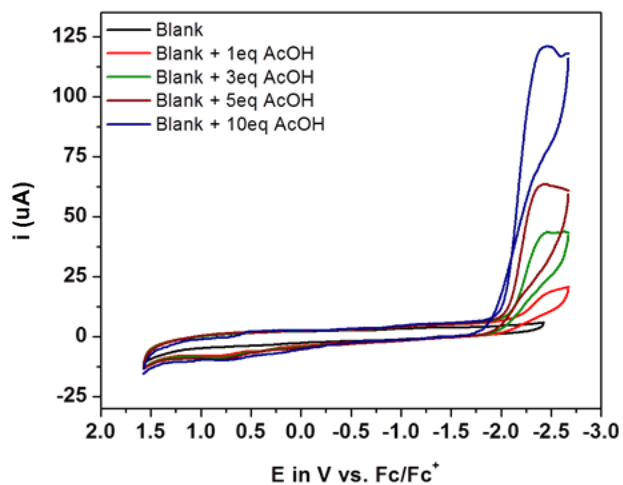

**Figure S24.** UV-Visible spectra of the solution before and after bulk-electrolysis at -1.8 V versus Ag/AgCl in the presence of HOAc

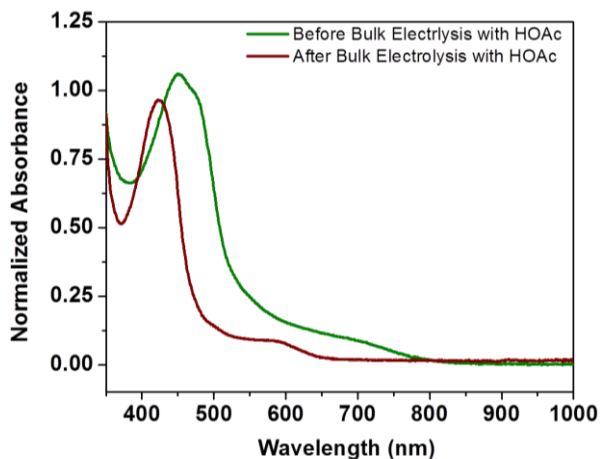

**Table S5. Cartesian coordinates for DFT calculations**

| [CoL -Cl] <sup>0</sup> |             |             |             | [CoL -Cl] <sup>+1</sup> |             |             |             |
|------------------------|-------------|-------------|-------------|-------------------------|-------------|-------------|-------------|
| H                      | -1.89542700 | 2.17885300  | 4.42383300  | Cl                      | 1.87901500  | 6.57376500  | 0.54299000  |
| H                      | -0.32766400 | 0.49487400  | 3.60660900  | Cl                      | 2.95515600  | -3.58079600 | -2.30476100 |
| H                      | 2.78275000  | -1.95529100 | 3.05646700  | Cl                      | 4.80595500  | -3.96281500 | 2.75576100  |
| C                      | -1.78396900 | 2.03313300  | 3.35516000  | Cl                      | -2.47703200 | -3.86755700 | 0.50097200  |
| C                      | -0.89014200 | 1.08075500  | 2.89073500  | Cl                      | -6.99984800 | -0.90931500 | 0.72742000  |
| H                      | -3.23723600 | 3.53638100  | 2.83275600  | H                       | -1.74507700 | 2.31677500  | 4.46936800  |
| H                      | 1.07907200  | -0.52201700 | 2.66246800  | H                       | -0.25795600 | 0.55338300  | 3.64463700  |
| C                      | 2.81848000  | -2.26688200 | 2.01871600  | H                       | 3.03883300  | -1.75825700 | 2.96261100  |
| C                      | -2.53930800 | 2.79359200  | 2.46393800  | C                       | -1.64768400 | 2.16193000  | 3.39983600  |
| C                      | 3.70804100  | -3.22704300 | 1.61107000  | C                       | -0.79734000 | 1.16805500  | 2.93323300  |
| C                      | 1.02191800  | -0.70431900 | 1.59190800  | H                       | -3.04447200 | 3.72238300  | 2.88226900  |
| C                      | -0.73955500 | 0.88392400  | 1.51319600  | H                       | 1.26223100  | -0.34975700 | 2.64687400  |
| H                      | -5.15462300 | -3.08823900 | 1.01021400  | C                       | 2.94792500  | -2.15727500 | 1.95777400  |
| C                      | 1.93572200  | -1.67315100 | 1.08836800  | C                       | -2.38114000 | 2.94905100  | 2.51014900  |
| H                      | 3.81371100  | 4.46267300  | 0.44847200  | C                       | 3.77364400  | -3.16998700 | 1.53195000  |
| C                      | -2.40507400 | 2.59035300  | 1.09702200  | C                       | 1.11357400  | -0.61358200 | 1.60177300  |
| N                      | 0.14530400  | -0.03522700 | 0.90821900  | C                       | -0.66716100 | 0.96251700  | 1.55369400  |
| C                      | 3.75062000  | -3.63601600 | 0.27017100  | H                       | -5.49939400 | -2.75626200 | 1.04979100  |
| C                      | -4.64976900 | -2.26045700 | 0.52786000  | C                       | 1.96821800  | -1.62744800 | 1.08566200  |
| H                      | 4.45255000  | -4.39712100 | -0.04822800 | H                       | 4.18711500  | 4.04356900  | 0.21060200  |
| C                      | -5.31708200 | -1.07111600 | 0.26547700  | C                       | -2.27652700 | 2.73084300  | 1.14010100  |
| C                      | 2.86952800  | 4.08930700  | 0.07203900  | N                       | 0.18059100  | 0.01307200  | 0.94369800  |
| C                      | 1.75272600  | 4.91186700  | 0.00457700  | C                       | 3.64881600  | -3.69478100 | 0.23456900  |
| C                      | -1.51269800 | 1.63373800  | 0.62903400  | C                       | -4.90446800 | -1.98148200 | 0.58174000  |
| H                      | -3.00021300 | 3.17568200  | 0.40577000  | H                       | 4.29934900  | -4.49660900 | -0.09623800 |
| C                      | -3.31467000 | -2.37093800 | 0.17109500  | C                       | -5.48301100 | -0.75154300 | 0.23350100  |
| C                      | 2.75631400  | 2.76988700  | -0.34187800 | C                       | 3.19192200  | 3.75474900  | -0.10678700 |
| C                      | 1.95239500  | -2.05328600 | -0.28933800 | C                       | 2.15254400  | 4.68154000  | -0.12682100 |
| C                      | -4.66587400 | -0.01120700 | -0.34928200 | C                       | -1.43022900 | 1.73107300  | 0.67087800  |
| C                      | 0.54201300  | 4.43558600  | -0.47994800 | H                       | -2.86058100 | 3.33443000  | 0.45332400  |
| H                      | -0.32043800 | 5.09049300  | -0.53297900 | C                       | -3.56793900 | -2.18162400 | 0.32160400  |
| H                      | -5.19782700 | 0.91238500  | -0.54883700 | C                       | 2.93601700  | 2.44449100  | -0.49220500 |
| C                      | 2.89579400  | -3.06488100 | -0.64306500 | C                       | 1.81975700  | -2.12533100 | -0.24596100 |
| C                      | 1.54898800  | 2.23930700  | -0.84290100 | C                       | -4.73763300 | 0.27969400  | -0.37605000 |
| C                      | -2.60709000 | -1.32472800 | -0.46524100 | C                       | 0.87497000  | 4.31898800  | -0.54137000 |
| C                      | 0.44639100  | 3.11647000  | -0.90822000 | H                       | 0.07783200  | 5.05451600  | -0.56585500 |
| C                      | -3.33132600 | -0.13904300 | -0.71930000 | H                       | -5.23160000 | 1.20907700  | -0.63772400 |
| N                      | -1.33124200 | 1.36073200  | -0.79612500 | C                       | 2.69595500  | -3.18543700 | -0.62233000 |
| Co                     | -0.03267800 | -0.13677200 | -0.95636400 | C                       | 1.65261800  | 2.03166600  | -0.91151800 |
| O                      | 1.46673800  | 0.99770800  | -1.26441800 | C                       | -2.76302800 | -1.14706700 | -0.29608200 |
| O                      | 1.18846300  | -1.55825300 | -1.19032700 | C                       | 0.63534200  | 3.00893800  | -0.94539300 |
| O                      | -1.36032300 | -1.48442900 | -0.82650300 | C                       | -3.40302500 | 0.09577300  | -0.64462900 |
| C                      | -0.81596800 | 2.58346100  | -1.50747000 | N                       | -1.28183400 | 1.42264000  | -0.75525400 |
| H                      | -1.59652600 | 3.34880600  | -1.49294600 | Co                      | -0.10128100 | -0.16889000 | -0.89586600 |
| C                      | -2.63366600 | 0.97097800  | -1.44050600 | O                       | 1.43034400  | 0.79241900  | -1.31611900 |
| H                      | -3.28104000 | 1.85102600  | -1.48540800 | O                       | 0.94529700  | -1.69547400 | -1.09217100 |
| H                      | -0.66175200 | 2.28161900  | -2.54670300 | O                       | -1.53417500 | -1.37254600 | -0.53245300 |
| H                      | -2.38428200 | 0.69175600  | -2.46681400 | C                       | -0.68805800 | 2.59091600  | -1.49814500 |
| O                      | -0.15794800 | -0.10612700 | -2.95095400 | H                       | -1.39777300 | 3.42249200  | -1.46567000 |
| H                      | 0.72273400  | 0.23778000  | -3.16385700 | C                       | -2.60853600 | 1.12658800  | -1.38462300 |
| H                      | 0.30885100  | -2.07049400 | -3.48075100 | H                       | -3.18879500 | 2.05051100  | -1.45733900 |
| C                      | -0.41730600 | -1.29597500 | -3.72595200 | H                       | -0.59594900 | 2.27006100  | -2.54083100 |
| H                      | -1.41823000 | -1.62953900 | -3.46544300 | H                       | -2.40073600 | 0.79360900  | -2.40607600 |
| H                      | -0.36992100 | -1.03506500 | -4.78445000 | O                       | -0.33295800 | -0.22094700 | -2.85354000 |
| Cl                     | 4.16153900  | 1.73840400  | -0.26232200 |                         |             |             |             |



|    |             |             |             |
|----|-------------|-------------|-------------|
| H  | 0.53841500  | 0.10878300  | -3.13350700 |
| H  | 0.06973900  | -2.22274900 | -3.30513300 |
| C  | -0.63551200 | -1.43787400 | -3.57751000 |
| H  | -1.64894700 | -1.72750100 | -3.30736800 |
| H  | -0.58779900 | -1.21845000 | -4.64503900 |
| Cl | 4.23947500  | 1.29204600  | -0.47789400 |
| Cl | 2.46546600  | 6.32501700  | 0.37494200  |
| Cl | 2.55077700  | -3.84449400 | -2.22546100 |
| Cl | 4.98941700  | -3.82876800 | 2.59743500  |
| Cl | -2.81299300 | -3.66472900 | 0.73326600  |
| Cl | -7.14739300 | -0.49365400 | 0.55904100  |

[CoL -Cl]<sup>+2</sup>

|    |             |             |             |
|----|-------------|-------------|-------------|
| H  | -1.69642600 | 2.43630400  | 4.44813800  |
| H  | -0.21508700 | 0.65005300  | 3.65369400  |
| H  | 3.14129200  | -1.65399400 | 2.91506900  |
| C  | -1.60387900 | 2.25591100  | 3.38219500  |
| C  | -0.75748200 | 1.25211200  | 2.93337500  |
| H  | -2.99555500 | 3.80603000  | 2.83428600  |
| H  | 1.33114400  | -0.23964800 | 2.64441100  |
| C  | 2.99257000  | -2.06854300 | 1.92355300  |
| C  | -2.34048600 | 3.02215800  | 2.47581900  |
| C  | 3.81291000  | -3.12583400 | 1.48865200  |
| C  | 1.14859300  | -0.53180000 | 1.61330900  |
| C  | -0.64395700 | 1.01911400  | 1.55650900  |
| H  | -5.55910700 | -2.67333600 | 1.09398300  |
| C  | 2.00133500  | -1.56776800 | 1.09731000  |
| H  | 4.26407900  | 3.90845800  | 0.16070600  |
| C  | -2.24962400 | 2.77616000  | 1.10772100  |
| N  | 0.19717500  | 0.05633700  | 0.96005700  |
| C  | 3.64632800  | -3.71757400 | 0.22297100  |
| C  | -4.95118200 | -1.91331200 | 0.61736000  |
| H  | 4.28708400  | -4.53556200 | -0.08570200 |
| C  | -5.51369400 | -0.68399600 | 0.24042500  |
| C  | 3.26139200  | 3.64519500  | -0.15694100 |
| C  | 2.24981500  | 4.60240500  | -0.19125600 |
| C  | -1.41081900 | 1.76473000  | 0.65616700  |
| H  | -2.83824000 | 3.36944100  | 0.41588200  |
| C  | -3.61412300 | -2.13157700 | 0.37590400  |
| C  | 2.96781400  | 2.33796000  | -0.52662500 |
| C  | 1.80353300  | -2.13931700 | -0.22225000 |
| C  | -4.74951800 | 0.33050600  | -0.38142300 |
| C  | 0.96089600  | 4.27392800  | -0.60203300 |
| H  | 0.18551900  | 5.03266500  | -0.63254400 |
| H  | -5.23333300 | 1.25962900  | -0.66371600 |
| C  | 2.66304400  | -3.24646500 | -0.61468000 |
| C  | 1.67483300  | 1.96677200  | -0.94789600 |
| C  | -2.79489900 | -1.11379700 | -0.25292000 |
| C  | 0.68456200  | 2.96750600  | -0.99332900 |
| C  | -3.41591600 | 0.12869300  | -0.63360200 |
| N  | -1.26841600 | 1.42424700  | -0.76365000 |
| Co | -0.13100500 | -0.17479100 | -0.87185200 |
| O  | 1.41182700  | 0.72647100  | -1.34033200 |
| O  | 0.92056700  | -1.73975300 | -1.02677300 |
| O  | -1.56300400 | -1.35417900 | -0.46337700 |
| C  | -0.65157200 | 2.57168100  | -1.53125300 |
| H  | -1.34734900 | 3.41468300  | -1.50146200 |
| C  | -2.60409100 | 1.13750600  | -1.38712100 |

|    |             |             |             |
|----|-------------|-------------|-------------|
| H  | -3.16434200 | 2.07270100  | -1.47071900 |
| H  | -0.57930200 | 2.23259800  | -2.56964700 |
| H  | -2.40050200 | 0.79194400  | -2.40512600 |
| O  | -0.39170500 | -0.28889900 | -2.80773900 |
| H  | 0.46857100  | 0.02694300  | -3.14535100 |
| H  | -0.05296600 | -2.29736300 | -3.30668500 |
| C  | -0.76980500 | -1.50158300 | -3.50927800 |
| H  | -1.75955600 | -1.77883300 | -3.15269600 |
| H  | -0.80879500 | -1.26970800 | -4.57451200 |
| Cl | 4.22617700  | 1.13984500  | -0.48722800 |
| Cl | 2.60994700  | 6.23921100  | 0.29137100  |
| Cl | 2.42808700  | -3.93816800 | -2.15825300 |
| Cl | 5.03230100  | -3.71405700 | 2.52937000  |
| Cl | -2.87490700 | -3.60888300 | 0.82271100  |
| Cl | -7.17385600 | -0.40097600 | 0.54137800  |

[CoL -Cl]<sup>+3</sup>

|    |             |             |             |
|----|-------------|-------------|-------------|
| H  | -1.57295700 | 2.32468600  | 4.62724000  |
| H  | -0.33456000 | 0.40202500  | 3.75938800  |
| H  | 2.39026700  | -2.55999700 | 3.04346000  |
| C  | -1.46203900 | 2.20528100  | 3.55465800  |
| C  | -0.75279500 | 1.11929100  | 3.06318100  |
| H  | -2.59210300 | 3.97923100  | 3.07597500  |
| H  | 0.93770100  | -0.79156600 | 2.77085800  |
| C  | 2.33815900  | -2.79357600 | 1.98540300  |
| C  | -2.03743800 | 3.13342600  | 2.68368800  |
| C  | 3.05531000  | -3.90249700 | 1.48901600  |
| C  | 0.84242600  | -0.91449500 | 1.69532300  |
| C  | -0.61099000 | 0.96396700  | 1.67786800  |
| H  | -5.72661200 | -2.27176700 | 0.68695900  |
| C  | 1.57502200  | -2.01590900 | 1.13312800  |
| H  | 4.78643000  | 3.70332600  | 0.19543600  |
| C  | -1.91609900 | 2.97401800  | 1.30576400  |
| N  | 0.09951200  | -0.07802100 | 1.04179000  |
| C  | 3.00605000  | -4.26317600 | 0.13121200  |
| C  | -5.04410000 | -1.51551400 | 0.31714800  |
| H  | 3.55997300  | -5.12356100 | -0.22621600 |
| C  | -5.48209500 | -0.19757800 | 0.11737600  |
| C  | 3.75655200  | 3.49598400  | -0.07124300 |
| C  | 2.80727500  | 4.52908500  | -0.10641700 |
| C  | -1.20703800 | 1.88575400  | 0.81252000  |
| H  | -2.37995300 | 3.69522800  | 0.64107800  |
| C  | -3.73200900 | -1.82801700 | 0.04198800  |
| C  | 3.35416100  | 2.21484800  | -0.37421700 |
| C  | 1.50962000  | -2.34541700 | -0.27599600 |
| C  | -4.61727900 | 0.81574000  | -0.37182200 |
| C  | 1.45244400  | 4.29404800  | -0.46217100 |
| H  | 0.76521000  | 5.13202200  | -0.50860400 |
| H  | -5.01185800 | 1.81312700  | -0.53340300 |
| C  | 2.24906800  | -3.51138400 | -0.73782500 |
| C  | 1.96936500  | 1.93557900  | -0.70460700 |
| C  | -2.81403700 | -0.80951300 | -0.43439000 |
| C  | 1.03670100  | 3.02566800  | -0.76754800 |
| C  | -3.30949800 | 0.52176500  | -0.65288200 |
| N  | -1.05646400 | 1.63048200  | -0.62681100 |
| Co | -0.07774000 | -0.05657600 | -0.83242800 |
| O  | 1.62325500  | 0.73019400  | -0.94457900 |
| O  | 0.84633400  | -1.67833100 | -1.11617900 |

|    |             |             |             |
|----|-------------|-------------|-------------|
| O  | -1.60107600 | -1.13409100 | -0.65678700 |
| C  | -0.33193400 | 2.75762000  | -1.30982400 |
| H  | -0.94175600 | 3.66045900  | -1.23171300 |
| C  | -2.40166200 | 1.52444100  | -1.29352800 |
| H  | -2.87510600 | 2.50920700  | -1.28481300 |
| H  | -0.27553100 | 2.49377900  | -2.37098600 |
| H  | -2.21508200 | 1.26844200  | -2.34090600 |
| O  | -0.19933400 | 0.05324300  | -2.77614600 |
| H  | 0.69782000  | 0.22154000  | -3.11777300 |
| H  | -0.26296200 | -1.95213400 | -3.39407800 |
| C  | -0.78173200 | -1.01279000 | -3.58373700 |
| H  | -1.83071700 | -1.08840700 | -3.30882900 |
| H  | -0.68939900 | -0.71402900 | -4.62831400 |
| Cl | 4.45826700  | 0.91486400  | -0.33824200 |
| Cl | 3.28838000  | 6.11821800  | 0.27521700  |
| Cl | 2.16308100  | -3.91238100 | -2.39206000 |
| Cl | 3.99621000  | -4.82786900 | 2.56706400  |
| Cl | -3.13933700 | -3.41146200 | 0.27399500  |
| Cl | -7.10148700 | 0.20514300  | 0.46655900  |

[CoL -Cl]<sup>-1</sup>

|   |             |             |             |
|---|-------------|-------------|-------------|
| H | -1.96089100 | 2.15667400  | 4.50544400  |
| H | -0.43407600 | 0.44178500  | 3.65342100  |
| H | 2.85084600  | -1.57698700 | 3.22508900  |
| C | -1.84127300 | 2.03499500  | 3.43237300  |
| C | -0.96590800 | 1.07127000  | 2.94693100  |
| H | -3.25604700 | 3.58571500  | 2.92489200  |
| H | 1.19520000  | -0.25410500 | 2.71587200  |
| C | 2.89280400  | -2.02196600 | 2.23467400  |
| C | -2.57139100 | 2.83077400  | 2.54911900  |
| C | 3.82435300  | -2.99543000 | 1.96028100  |
| C | 1.04206900  | -0.58423800 | 1.68478200  |
| C | -0.79150900 | 0.89051300  | 1.56469200  |
| H | -5.40067600 | -3.03919700 | 0.86138000  |
| C | 1.97264300  | -1.58969400 | 1.25029600  |
| H | 3.94060200  | 4.35956300  | 0.16619100  |
| C | -2.43348500 | 2.63568000  | 1.17797400  |
| N | 0.08355100  | -0.05122000 | 0.98554900  |
| C | 3.88412600  | -3.58272900 | 0.68689500  |
| C | -4.86390000 | -2.20215200 | 0.42752300  |
| H | 4.61708500  | -4.35221300 | 0.46848400  |
| C | -5.42789600 | -0.93056200 | 0.39352900  |
| C | 2.96235000  | 4.00482400  | -0.14046700 |
| C | 1.83722500  | 4.81397700  | -0.01910300 |
| C | -1.56254300 | 1.66746600  | 0.67843700  |
| H | -3.01780000 | 3.24065300  | 0.49015800  |
| C | -3.59368800 | -2.38312500 | -0.10488400 |
| C | 2.81205600  | 2.72575500  | -0.66301300 |
| C | 1.99917800  | -2.15494100 | -0.08101900 |
| C | -4.73407200 | 0.13841400  | -0.16604400 |
| C | 0.58623700  | 4.35594500  | -0.42134900 |
| H | -0.28296200 | 5.00192000  | -0.33410000 |
| H | -5.18832400 | 1.12512300  | -0.19309800 |
| C | 3.00037000  | -3.16777900 | -0.28453500 |
| C | 1.56103700  | 2.19619300  | -1.07551900 |
| C | -2.83073500 | -1.33186000 | -0.68398000 |
| C | 0.44792100  | 3.07441000  | -0.94798200 |
| C | -3.46382100 | -0.05446600 | -0.70197200 |

|    |             |             |             |
|----|-------------|-------------|-------------|
| N  | -1.43344800 | 1.42205200  | -0.74491500 |
| Co | -0.08983900 | -0.30484800 | -1.02095400 |
| O  | 1.43366100  | 0.99613100  | -1.56349300 |
| O  | 1.22314900  | -1.82083700 | -1.03764700 |
| O  | -1.65791800 | -1.52593900 | -1.19935600 |
| C  | -0.87819300 | 2.60200400  | -1.46762100 |
| H  | -1.60254300 | 3.42925500  | -1.43976000 |
| C  | -2.74173100 | 1.07542100  | -1.37539600 |
| H  | -3.39124000 | 1.96231500  | -1.40822700 |
| H  | -0.77966400 | 2.28951900  | -2.51426500 |
| H  | -2.50402700 | 0.80681700  | -2.41175900 |
| O  | 0.00296300  | -0.17605700 | -3.33920500 |
| H  | 0.79391900  | 0.37208200  | -3.15517500 |
| H  | 1.13896000  | -1.88855700 | -3.71243300 |
| C  | 0.35745900  | -1.27466600 | -4.17198000 |
| H  | -0.53997800 | -1.88382600 | -4.30082500 |
| H  | 0.69170500  | -0.92886000 | -5.15849100 |
| Cl | 4.23825100  | 1.72009100  | -0.82385100 |
| Cl | 2.00524600  | 6.43248300  | 0.64306600  |
| Cl | 3.09159900  | -3.90532900 | -1.86693000 |
| Cl | 4.95060500  | -3.52277700 | 3.19638900  |
| Cl | -2.89343500 | -3.99057100 | -0.06535000 |
| Cl | -7.03274200 | -0.67879200 | 1.06492800  |

[CoL -Cl]<sup>-2</sup>

|    |             |             |             |
|----|-------------|-------------|-------------|
| H  | -1.80416000 | -1.79163800 | -4.93990500 |
| C  | -1.68879100 | -1.80001100 | -3.85760100 |
| C  | -0.92782100 | -0.80702800 | -3.25333900 |
| C  | -2.30863700 | -2.79388800 | -3.09830800 |
| H  | -0.48669900 | -0.03939700 | -3.88082300 |
| H  | -0.74459400 | -0.76404900 | -1.84501000 |
| H  | -2.90271000 | -3.57184500 | -3.56969600 |
| C  | -2.15706400 | -2.75979600 | -1.70881600 |
| N  | 0.00113200  | 0.16838600  | -1.16232600 |
| C  | -1.40440300 | -1.77137200 | -1.08536900 |
| H  | -2.64268700 | -3.52269400 | -1.10346000 |
| C  | 0.75845200  | 1.07747600  | -1.82606500 |
| N  | -1.26261900 | -1.73381800 | 0.36342700  |
| H  | 0.83183500  | 0.98986200  | -2.91066400 |
| C  | 1.51865000  | 2.13937000  | -1.27603000 |
| C  | 2.24429900  | 2.95307700  | -2.19696100 |
| C  | 1.60421300  | 2.45789400  | 0.14670000  |
| H  | 2.18610100  | 2.71824600  | -3.25681500 |
| C  | 3.00548500  | 4.02487200  | -1.77432700 |
| C  | 2.40091400  | 3.57454600  | 0.48303400  |
| O  | 0.99317700  | 1.77938900  | 1.07072500  |
| C  | 3.10640700  | 4.36967000  | -0.42775600 |
| Cl | 3.87788600  | 4.99393100  | -2.96791000 |
| Cl | 2.52720400  | 4.00414900  | 2.18928600  |
| H  | 3.70226600  | 5.21078700  | -0.09375200 |
| C  | -0.56315400 | -2.94160900 | 0.87527400  |
| C  | 0.86280300  | -3.05362500 | 0.42558600  |
| H  | -1.11861900 | -3.84939900 | 0.59650900  |
| H  | -0.58175100 | -2.86658900 | 1.96948100  |
| C  | 1.29715600  | -4.11371300 | -0.36374400 |
| C  | 1.76480900  | -2.06620600 | 0.90635700  |
| C  | 2.64733900  | -4.23384200 | -0.68353600 |
| H  | 0.58390200  | -4.85177500 | -0.71997200 |

|    |             |             |             |
|----|-------------|-------------|-------------|
| C  | 3.12729100  | -2.25131500 | 0.56762100  |
| O  | 1.34986500  | -1.06407300 | 1.64070400  |
| C  | 3.57527000  | -3.30881300 | -0.21769900 |
| Cl | 3.19281500  | -5.57361900 | -1.68183600 |
| Cl | 4.30309400  | -1.09691000 | 1.16292900  |
| H  | 4.62850300  | -3.40392600 | -0.45939300 |
| C  | -2.57859500 | -1.66110800 | 1.05322800  |
| C  | -3.40267400 | -0.46700500 | 0.67860800  |
| H  | -3.15496900 | -2.58178100 | 0.87758500  |
| H  | -2.35289200 | -1.62044100 | 2.12637800  |
| C  | -4.65295300 | -0.61396800 | 0.08615900  |
| C  | -2.88500000 | 0.81393600  | 1.02917500  |
| C  | -5.44321600 | 0.50469300  | -0.16409900 |
| H  | -5.01651600 | -1.60549100 | -0.16971700 |
| C  | -3.74534000 | 1.91358700  | 0.76161900  |
| O  | -1.72450600 | 0.95305200  | 1.59311900  |
| C  | -4.99805000 | 1.77828900  | 0.17477500  |
| Cl | -7.02363500 | 0.31246800  | -0.91178000 |
| Cl | -3.19931000 | 3.52450600  | 1.19249300  |
| H  | -5.61144900 | 2.65289000  | -0.01471300 |
| H  | 0.69066300  | -1.44474300 | 3.21586100  |
| O  | 0.24445000  | -1.64239300 | 4.07248600  |
| C  | 1.21919300  | -2.13975300 | 4.96392900  |
| H  | 2.01807600  | -1.40973600 | 5.16728500  |
| H  | 0.72257800  | -2.36631400 | 5.91351300  |
| H  | 1.69120100  | -3.06635700 | 4.60126100  |
| Co | -0.06574100 | 0.14858400  | 0.82490900  |

[CoL -CH<sub>3</sub>]<sup>0</sup>

|   |             |             |             |
|---|-------------|-------------|-------------|
| H | -2.06340000 | 1.81687800  | 4.48678500  |
| H | -0.26507100 | 0.38093700  | 3.67482700  |
| H | 3.01352000  | -1.80419400 | 3.16775200  |
| C | -1.93472500 | 1.68236500  | 3.41825500  |
| C | -0.91093100 | 0.86930200  | 2.95594600  |
| H | -3.59642000 | 2.95131700  | 2.89189900  |
| H | 1.19417300  | -0.54866400 | 2.74848100  |
| C | 3.14575000  | -2.06655000 | 2.12103700  |
| C | -2.79615200 | 2.31830900  | 2.52551200  |
| C | 4.17748600  | -2.89151700 | 1.74715000  |
| C | 1.19466000  | -0.69885800 | 1.67067400  |
| C | -0.73341900 | 0.68482900  | 1.57846700  |
| H | -4.46585600 | -3.95151600 | 0.94537100  |
| C | 2.22811400  | -1.53275600 | 1.17620800  |
| H | 3.20399600  | 4.96514300  | 0.46636600  |
| C | -2.63000600 | 2.13200400  | 1.15932300  |
| N | 0.26547800  | -0.10628900 | 0.97685200  |
| C | 4.29398500  | -3.19675300 | 0.36877900  |
| C | -4.09236800 | -3.03686600 | 0.48801100  |
| H | 5.10530200  | -3.84876800 | 0.05072300  |
| C | -4.98115200 | -1.97494700 | 0.27382300  |
| C | 2.32410200  | 4.44021600  | 0.09877700  |
| C | 1.10320400  | 5.12434300  | 0.04115300  |
| C | -1.60601300 | 1.31686100  | 0.69272800  |
| H | -3.30274900 | 2.62002300  | 0.46332300  |
| C | -2.74431300 | -2.97295500 | 0.15180300  |
| C | 2.46375500  | 3.10979600  | -0.28702400 |
| C | 2.36007700  | -1.84988400 | -0.20973400 |
| C | -4.46636000 | -0.82124300 | -0.31113000 |

|    |             |             |             |
|----|-------------|-------------|-------------|
| C  | -0.00236600 | 4.42513200  | -0.43787100 |
| H  | -0.96660500 | 4.92432800  | -0.50359500 |
| H  | -5.12445300 | 0.02545600  | -0.49511900 |
| C  | 3.43627700  | -2.71333100 | -0.59566200 |
| C  | 1.32818100  | 2.41728600  | -0.77156300 |
| C  | -2.23772900 | -1.79062800 | -0.44855400 |
| C  | 0.10117100  | 3.09623400  | -0.84951200 |
| C  | -3.12376200 | -0.72347900 | -0.68065500 |
| N  | -1.38237100 | 1.07834200  | -0.73023000 |
| Co | 0.13618800  | -0.20287200 | -0.89003200 |
| O  | 1.44517100  | 1.16038100  | -1.18376900 |
| O  | 1.57187900  | -1.40983600 | -1.13023800 |
| O  | -0.96691100 | -1.74412700 | -0.80792100 |
| C  | -1.06325100 | 2.36800000  | -1.43839200 |
| H  | -1.95525600 | 3.00181400  | -1.42048000 |
| C  | -2.60740600 | 0.49439800  | -1.37745100 |
| H  | -3.38343300 | 1.26563000  | -1.41068100 |
| H  | -0.87457300 | 2.08844700  | -2.47866900 |
| H  | -2.31330200 | 0.27782100  | -2.40781300 |
| O  | 0.04122700  | -0.14354400 | -2.89673600 |
| H  | 0.87319500  | 0.33602100  | -3.03583500 |
| H  | 0.82073700  | -2.00267000 | -3.42641900 |
| C  | 0.00558400  | -1.33441900 | -3.70314300 |
| H  | -0.94852500 | -1.81788700 | -3.50786600 |
| H  | 0.07402900  | -1.04901800 | -4.75477700 |
| C  | 3.78931100  | 2.40798400  | -0.22004000 |
| H  | 3.72002800  | 1.48540500  | 0.36395600  |
| H  | 4.13841000  | 2.11744400  | -1.21687600 |
| H  | 4.54921200  | 3.04966400  | 0.23196600  |
| C  | 0.99329600  | 6.55567800  | 0.49717700  |
| H  | 1.10260800  | 6.64105100  | 1.58437100  |
| H  | 1.77044500  | 7.18165500  | 0.04731500  |
| H  | 0.02339500  | 6.98206800  | 0.22965600  |
| C  | 3.59646900  | -3.06300000 | -2.04501100 |
| H  | 2.70947400  | -3.57757100 | -2.42830200 |
| H  | 3.72528200  | -2.16475100 | -2.65735600 |
| H  | 4.46213600  | -3.71124300 | -2.19571100 |
| C  | 5.15545700  | -3.46027200 | 2.73833500  |
| H  | 5.13913700  | -4.55536200 | 2.73223800  |
| H  | 6.18134200  | -3.15373000 | 2.50781600  |
| H  | 4.92704400  | -3.12779100 | 3.75343000  |
| C  | -1.82058400 | -4.13141000 | 0.39423800  |
| H  | -1.41667800 | -4.52558800 | -0.54464700 |
| H  | -0.95857700 | -3.83252900 | 0.99890500  |
| H  | -2.33956500 | -4.94390800 | 0.90840200  |
| C  | -6.43020800 | -2.08211300 | 0.67061500  |
| H  | -6.92296200 | -2.92517900 | 0.17429200  |
| H  | -6.54321200 | -2.23620500 | 1.74950300  |
| H  | -6.97940000 | -1.17488100 | 0.40696100  |

[CoL -CH<sub>3</sub>]<sup>+1</sup>

|   |             |             |            |
|---|-------------|-------------|------------|
| H | -1.74711900 | 2.19347400  | 4.48653100 |
| H | -0.13074800 | 0.53829500  | 3.68176700 |
| H | 3.26115000  | -1.60723500 | 3.03648100 |
| C | -1.65117100 | 2.02102700  | 3.41867400 |
| C | -0.72781500 | 1.08832200  | 2.96260700 |
| H | -3.18049000 | 3.44788600  | 2.88425000 |
| H | 1.41947300  | -0.30731400 | 2.69323200 |



|                                          |             |             |             |    |             |             |             |
|------------------------------------------|-------------|-------------|-------------|----|-------------|-------------|-------------|
| H                                        | -1.27489600 | 3.38607500  | -1.21640900 | C  | 3.62424600  | 3.64010200  | -0.03542700 |
| C                                        | -2.47601700 | 1.08253800  | -1.27845300 | C  | 2.63793400  | 4.64393500  | -0.09943100 |
| H                                        | -3.06672500 | 2.00348300  | -1.29367600 | C  | -1.18731000 | 1.72024200  | 0.82601700  |
| H                                        | -0.50171600 | 2.28944800  | -2.36101200 | H  | -2.44177000 | 3.47031600  | 0.63508100  |
| H                                        | -2.24767800 | 0.83212400  | -2.31933800 | C  | -3.44687400 | -2.21465800 | 0.00447500  |
| O                                        | -0.12563900 | -0.16893500 | -2.76819700 | C  | 3.34360000  | 2.31683600  | -0.30706800 |
| H                                        | 0.77799400  | 0.01745100  | -3.07808400 | C  | 1.72993500  | -2.39911800 | -0.23284900 |
| H                                        | -0.07192700 | -2.20869300 | -3.22949800 | C  | -4.52215500 | 0.38512800  | -0.36342500 |
| C                                        | -0.61639100 | -1.30990600 | -3.51918900 | C  | 1.30836400  | 4.28719000  | -0.47439900 |
| H                                        | -1.67498500 | -1.41160400 | -3.28950100 | H  | 0.56040500  | 5.07106300  | -0.55640000 |
| H                                        | -0.48765600 | -1.09440700 | -4.58094400 | H  | -4.97177900 | 1.36291600  | -0.51364900 |
| C                                        | 4.28263200  | 1.40315600  | -0.48624100 | C  | 2.53243900  | -3.51410000 | -0.71381800 |
| H                                        | 4.09314500  | 0.61781500  | 0.25451600  | C  | 1.97865200  | 1.97081700  | -0.65429000 |
| H                                        | 4.33800500  | 0.90559300  | -1.46154500 | C  | -2.62287500 | -1.11019900 | -0.44866300 |
| H                                        | 5.24824000  | 1.86503900  | -0.27047000 | C  | 0.97112000  | 2.99049700  | -0.75439400 |
| C                                        | 2.62328500  | 6.12699800  | 0.17500700  | C  | -3.19691100 | 0.19240000  | -0.64735100 |
| H                                        | 2.06480400  | 6.41131900  | 1.07679500  | N  | -1.02564000 | 1.46075400  | -0.60951400 |
| H                                        | 3.68349200  | 6.32462300  | 0.34515100  | Co | 0.06382400  | -0.16029400 | -0.80467000 |
| H                                        | 2.26515200  | 6.78157700  | -0.62957900 | O  | 1.71313100  | 0.73464900  | -0.87924100 |
| C                                        | 2.72992100  | -3.71057400 | -2.08375200 | O  | 1.10353300  | -1.70904500 | -1.09220900 |
| H                                        | 1.73992900  | -4.11333600 | -2.32998100 | O  | -1.38236000 | -1.34641900 | -0.67481900 |
| H                                        | 2.90750500  | -2.87160000 | -2.76694500 | C  | -0.37385400 | 2.62782600  | -1.29812400 |
| H                                        | 3.47439000  | -4.48524900 | -2.28772200 | H  | -1.04331500 | 3.48852800  | -1.22446600 |
| C                                        | 4.76384600  | -4.11005300 | 2.52631500  | C  | -2.36109500 | 1.26379700  | -1.27311700 |
| H                                        | 4.58730600  | -5.19085800 | 2.58867000  | H  | -2.90295300 | 2.21338100  | -1.25498800 |
| H                                        | 5.79044700  | -3.97385900 | 2.16466600  | H  | -0.30218900 | 2.36141400  | -2.35743800 |
| H                                        | 4.70758400  | -3.70120300 | 3.53953300  | H  | -2.15310800 | 1.03549600  | -2.32295900 |
| C                                        | -2.72050400 | -3.68452000 | 0.41607000  | O  | -0.02251500 | -0.03741600 | -2.75517000 |
| H                                        | -2.24300700 | -4.06775300 | -0.49315800 | H  | 0.88339600  | 0.13989900  | -3.06599500 |
| H                                        | -1.92365000 | -3.55821900 | 1.15825900  | H  | -0.08005100 | -2.04538000 | -3.36058500 |
| H                                        | -3.42812800 | -4.43046600 | 0.78398300  | C  | -0.57511000 | -1.09996100 | -3.58133100 |
| C                                        | -6.83985900 | -0.76050800 | 0.38234200  | H  | -1.63731900 | -1.16130300 | -3.35786800 |
| H                                        | -7.35386100 | -0.45156200 | -0.53694000 | H  | -0.43052100 | -0.81440100 | -4.62379800 |
| H                                        | -7.31386100 | -1.66853600 | 0.76053900  | C  | 4.36829800  | 1.23646900  | -0.22483400 |
| H                                        | -6.99561300 | 0.04631700  | 1.11029900  | H  | 4.08530800  | 0.49253700  | 0.52907500  |
| <b>[CoL-CH<sub>3</sub>]<sup>+3</sup></b> |             |             |             | H  | 4.44909200  | 0.70247100  | -1.17868600 |
| H                                        | -1.53087500 | 2.21302400  | 4.63610800  | H  | 5.34634700  | 1.64629000  | 0.03481600  |
| H                                        | -0.20809800 | 0.34201400  | 3.78926000  | C  | 2.95634100  | 6.06580600  | 0.21054500  |
| H                                        | 2.33906900  | -2.73557400 | 3.12782300  | H  | 2.35391100  | 6.41284300  | 1.06062300  |
| C                                        | -1.43086500 | 2.07726600  | 3.56421600  | H  | 4.01226700  | 6.20752200  | 0.44820400  |
| C                                        | -0.67665000 | 1.01709200  | 3.08304700  | H  | 2.69273600  | 6.71134500  | -0.63705900 |
| H                                        | -2.65021200 | 3.78689600  | 3.06847300  | C  | 2.58311600  | -3.78599200 | -2.17917100 |
| H                                        | 0.93961000  | -0.95542500 | 2.82091200  | H  | 1.58953500  | -4.05636800 | -2.55662000 |
| C                                        | 2.38287000  | -2.93367300 | 2.06063200  | H  | 2.90112900  | -2.89515400 | -2.73220700 |
| C                                        | -2.06096800 | 2.96064400  | 2.68469000  | H  | 3.27160300  | -4.60419600 | -2.39837900 |
| C                                        | 3.16379500  | -4.01807900 | 1.59874200  | C  | 3.91708900  | -4.88259200 | 2.55069600  |
| C                                        | 0.90439400  | -1.04555900 | 1.73833200  | H  | 3.53806900  | -5.91218900 | 2.50446000  |
| C                                        | -0.54605400 | 0.83769600  | 1.69909700  | H  | 4.97624000  | -4.92956300 | 2.26923100  |
| H                                        | -5.40722500 | -2.77160900 | 0.62484800  | H  | 3.83913900  | -4.52895300 | 3.58043700  |
| C                                        | 1.67461500  | -2.12277100 | 1.18839200  | C  | -2.82482700 | -3.55863900 | 0.18321200  |
| H                                        | 4.63648000  | 3.91821500  | 0.24390200  | H  | -2.39742300 | -3.91744200 | -0.76044900 |
| C                                        | -1.94238100 | 2.78283400  | 1.30963500  | H  | -2.00000600 | -3.51191200 | 0.90373500  |
| N                                        | 0.19324700  | -0.19051800 | 1.07148600  | H  | -3.55985300 | -4.28509500 | 0.53542800  |
| C                                        | 3.21522800  | -4.27533900 | 0.20867500  | C  | -6.77884700 | -0.42105700 | 0.41101000  |
| C                                        | -4.77664100 | -1.96077200 | 0.27147600  | H  | -7.29585300 | -0.05048000 | -0.48385700 |
| H                                        | 3.81892100  | -5.10799800 | -0.14224800 | H  | -7.29271400 | -1.31539600 | 0.76828500  |
| C                                        | -5.34307100 | -0.68125000 | 0.10840500  | H  | -6.87206600 | 0.36750800  | 1.16910500  |

| <b>[CoL -CH<sub>3</sub>]<sup>-1</sup></b> |             |             |             | <b>[CoL -CH<sub>3</sub>]<sup>-2</sup></b> |             |             |             |
|-------------------------------------------|-------------|-------------|-------------|-------------------------------------------|-------------|-------------|-------------|
| H                                         | 1.93922900  | 1.33117700  | -4.95884800 | H                                         | -5.04932700 | 1.75617400  | 0.69609000  |
| H                                         | 0.39687800  | -0.22960900 | -3.87089500 | C                                         | -2.63241700 | 5.50562900  | -1.57781600 |
| H                                         | -2.93264100 | -2.10476200 | -3.18985800 | H                                         | -2.82515300 | 5.22116500  | -2.62172800 |
| C                                         | 1.81235600  | 1.37136000  | -3.88017600 | H                                         | -3.53680000 | 6.00807900  | -1.21406200 |
| C                                         | 0.92738300  | 0.49603800  | -3.26234100 | H                                         | -1.82215000 | 6.24290700  | -1.58850700 |
| H                                         | 3.23860400  | 2.96888400  | -3.59672900 | C                                         | -2.97605300 | -3.83610500 | 1.91682700  |
| H                                         | -1.24666400 | -0.75463100 | -2.86015500 | H                                         | -2.01371500 | -4.28627000 | 2.19113300  |
| C                                         | -2.95429600 | -2.45954500 | -2.15944500 | H                                         | -3.13618100 | -3.00685200 | 2.61692500  |
| C                                         | 2.54451400  | 2.28286800  | -3.11915900 | H                                         | -3.76195100 | -4.58111600 | 2.07754200  |
| C                                         | -3.87660600 | -3.41331100 | -1.79218500 | C                                         | -4.87137700 | -3.98895500 | -2.76591500 |
| C                                         | -1.09403800 | -0.96037500 | -1.79650400 | H                                         | -4.75960500 | -5.07670200 | -2.86417300 |
| C                                         | 0.74209500  | 0.52087900  | -1.86912800 | H                                         | -5.90532900 | -3.80489300 | -2.44584900 |
| H                                         | 5.27924000  | -3.37296000 | -0.05461100 | H                                         | -4.74989000 | -3.55171700 | -3.76238000 |
| C                                         | -2.00794000 | -1.91216900 | -1.24864500 | C                                         | 2.84009400  | -3.82851900 | 1.04349200  |
| H                                         | -4.30771200 | 3.63357500  | -0.51055900 | H                                         | 2.58825200  | -3.89053800 | 2.11006200  |
| C                                         | 2.39468900  | 2.29227600  | -1.73503500 | H                                         | 1.89837000  | -3.97485200 | 0.49893300  |
| N                                         | -0.13448400 | -0.32992600 | -1.16948700 | H                                         | 3.50649300  | -4.66375000 | 0.80209100  |
| C                                         | -3.85487300 | -3.84578800 | -0.44240500 | C                                         | 6.74321400  | -1.19477000 | -0.80999400 |
| C                                         | 4.74761900  | -2.44013300 | 0.13953000  | H                                         | 7.45629700  | -1.82302600 | -0.26108300 |
| H                                         | -4.57472400 | -4.60233300 | -0.12831600 | H                                         | 6.73195200  | -1.56144900 | -1.84585400 |
| C                                         | 5.37116500  | -1.22562200 | -0.18448000 | H                                         | 7.14716200  | -0.17656700 | -0.83082500 |
| C                                         | -3.26464200 | 3.43128800  | -0.26393200 |                                           |             |             |             |
| C                                         | -2.27746500 | 4.31275900  | -0.72588800 |                                           |             |             |             |
| C                                         | 1.51410000  | 1.41524000  | -1.10013500 |                                           |             |             |             |
| H                                         | 2.97855300  | 2.98863600  | -1.13927900 |                                           |             |             |             |
| C                                         | 3.47481600  | -2.50898500 | 0.70174500  |                                           |             |             |             |
| C                                         | -2.97239100 | 2.30228600  | 0.50222300  |                                           |             |             |             |
| C                                         | -2.00443600 | -2.35208700 | 0.12454400  |                                           |             |             |             |
| C                                         | 4.66268600  | -0.05416900 | 0.08723800  |                                           |             |             |             |
| C                                         | -0.95502800 | 4.03118400  | -0.37671500 |                                           |             |             |             |
| H                                         | -0.15937300 | 4.70250500  | -0.70063300 |                                           |             |             |             |
| H                                         | 5.11949100  | 0.91070300  | -0.13541400 |                                           |             |             |             |
| C                                         | -2.96860500 | -3.35462600 | 0.49401700  |                                           |             |             |             |
| C                                         | -1.62245100 | 2.02016900  | 0.83187500  |                                           |             |             |             |
| C                                         | 2.75575300  | -1.30812500 | 0.96062300  |                                           |             |             |             |
| C                                         | -0.62157600 | 2.91511500  | 0.39308600  |                                           |             |             |             |
| C                                         | 3.38539900  | -0.07773000 | 0.65317200  |                                           |             |             |             |
| N                                         | 1.37126300  | 1.39303800  | 0.34154400  |                                           |             |             |             |
| Co                                        | 0.01670500  | -0.35267000 | 0.83320800  |                                           |             |             |             |
| O                                         | -1.30811700 | 0.95338000  | 1.56226400  |                                           |             |             |             |
| O                                         | -1.19800100 | -1.90838600 | 1.02753100  |                                           |             |             |             |
| O                                         | 1.55803200  | -1.35087400 | 1.50779000  |                                           |             |             |             |
| C                                         | 0.78152500  | 2.66360000  | 0.85304000  |                                           |             |             |             |
| H                                         | 1.43045500  | 3.51157500  | 0.58488400  |                                           |             |             |             |
| C                                         | 2.67785400  | 1.18663200  | 1.03169100  |                                           |             |             |             |
| H                                         | 3.33599500  | 2.05313400  | 0.86476500  |                                           |             |             |             |
| H                                         | 0.79311600  | 2.57228300  | 1.94596600  |                                           |             |             |             |
| H                                         | 2.43354900  | 1.17015700  | 2.10158900  |                                           |             |             |             |
| O                                         | -0.19266000 | 1.34433800  | 4.00661600  |                                           |             |             |             |
| H                                         | -0.64150900 | 1.23964100  | 3.13106600  |                                           |             |             |             |
| H                                         | -1.99845700 | 1.17217100  | 5.05926700  |                                           |             |             |             |
| C                                         | -1.13925200 | 1.84780100  | 4.92286600  |                                           |             |             |             |
| H                                         | -0.64472900 | 1.95899300  | 5.89411700  |                                           |             |             |             |
| H                                         | -1.52947000 | 2.83549400  | 4.62981300  |                                           |             |             |             |
| C                                         | -4.06081200 | 1.38383000  | 0.98537700  |                                           |             |             |             |
| H                                         | -3.94527200 | 0.37291500  | 0.57519400  |                                           |             |             |             |
| H                                         | -4.04154000 | 1.27685600  | 2.07701500  |                                           |             |             |             |

|                        |             |             |             |    |             |             |             |
|------------------------|-------------|-------------|-------------|----|-------------|-------------|-------------|
| C                      | 1.04148700  | -4.11844000 | -0.44006700 | C  | -2.83139600 | -3.73910200 | -1.51307900 |
| C                      | 1.71590200  | -2.10272700 | 0.75659200  | C  | -0.70296800 | -0.73001000 | -1.52491300 |
| C                      | 2.35575900  | -4.37797100 | -0.83714300 | C  | 0.70820200  | 1.17807600  | -1.47084900 |
| H                      | 0.24585800  | -4.80065100 | -0.74127700 | H  | 5.75527600  | -1.98219900 | -0.82149700 |
| C                      | 3.05657900  | -2.35575700 | 0.36568600  | C  | -1.41995100 | -1.84544700 | -1.00538200 |
| O                      | 1.41628900  | -1.05400800 | 1.51169400  | H  | -4.41773100 | 3.98029600  | -0.41548100 |
| C                      | 3.34252800  | -3.47700900 | -0.41430500 | C  | 2.05562900  | 3.15235300  | -1.08291600 |
| C                      | 2.69890100  | -5.56368400 | -1.70421200 | N  | 0.00405300  | 0.12305500  | -0.84964400 |
| C                      | 4.14073800  | -1.40695800 | 0.79772000  | C  | -2.84569300 | -4.09760200 | -0.15664900 |
| H                      | 4.37882600  | -3.65602700 | -0.70490900 | C  | 5.10835800  | -1.24038600 | -0.37059600 |
| H                      | 2.80753600  | -5.28350500 | -2.76163900 | H  | -3.39730400 | -4.96907400 | 0.17367600  |
| H                      | 3.64556100  | -6.02694200 | -1.40062500 | C  | 5.55827100  | 0.05266800  | -0.13475600 |
| H                      | 1.92014300  | -6.33307000 | -1.65436100 | C  | -3.42040300 | 3.77237500  | -0.04901200 |
| H                      | 3.97351500  | -0.39849500 | 0.39717400  | C  | -2.45525800 | 4.77043600  | 0.00187300  |
| H                      | 4.17395200  | -1.30174200 | 1.88951600  | C  | 1.33653200  | 2.06606400  | -0.59966500 |
| H                      | 5.12456700  | -1.74818200 | 0.45752100  | H  | 2.54141300  | 3.84033600  | -0.40059000 |
| C                      | -2.60308900 | -1.34547200 | 1.02530700  | C  | 3.80491500  | -1.56753900 | -0.02689300 |
| C                      | -3.29869900 | -0.05392000 | 0.72471100  | C  | -3.08272900 | 2.49290300  | 0.37062700  |
| H                      | -3.26957500 | -2.19476500 | 0.80399100  | C  | -1.41096100 | -2.17309100 | 0.38720500  |
| H                      | -2.37180900 | -1.38976100 | 2.09797400  | C  | 4.72443200  | 1.00208800  | 0.44019100  |
| C                      | -4.55813700 | -0.02097000 | 0.12430400  | C  | -1.17744600 | 4.50576000  | 0.47720800  |
| C                      | -2.66861100 | 1.14314900  | 1.15160700  | H  | -0.43475500 | 5.29422000  | 0.52356500  |
| C                      | -5.25424800 | 1.17509700  | -0.06980200 | H  | 5.08415600  | 2.00871800  | 0.62207100  |
| H                      | -5.01178900 | -0.96116100 | -0.19229800 | C  | -2.15405500 | -3.33491200 | 0.75581400  |
| C                      | -3.38192300 | 2.36480600  | 0.98340300  | C  | -1.79924000 | 2.17341700  | 0.86132700  |
| O                      | -1.48614800 | 1.12593800  | 1.72342200  | C  | 2.91833000  | -0.64235000 | 0.57102500  |
| C                      | -4.63863800 | 2.35245900  | 0.38011200  | C  | -0.85830500 | 3.22469900  | 0.91231800  |
| C                      | -6.59969100 | 1.20554500  | -0.75105400 | C  | 3.42544100  | 0.65760700  | 0.79785100  |
| C                      | -2.75740000 | 3.64323000  | 1.47028500  | N  | 1.19586400  | 1.79375800  | 0.83019600  |
| H                      | -5.16346500 | 3.30133100  | 0.25527500  | Co | 0.17243300  | 0.10128800  | 1.01834600  |
| H                      | -7.28060900 | 1.92190800  | -0.27473900 | O  | -1.50517900 | 0.96814100  | 1.29018500  |
| H                      | -6.52295600 | 1.49774900  | -1.80841400 | O  | -0.79015900 | -1.50272700 | 1.28371700  |
| H                      | -7.08201100 | 0.22162800  | -0.72550000 | O  | 1.71224700  | -1.00038200 | 0.92598300  |
| H                      | -2.56548300 | 3.61129900  | 2.55108500  | C  | 0.47633900  | 2.92367900  | 1.51596000  |
| H                      | -1.78399200 | 3.82356800  | 0.99616300  | H  | 1.11433600  | 3.81067700  | 1.48306300  |
| H                      | -3.40276000 | 4.50483900  | 1.26595500  | C  | 2.54056200  | 1.64849700  | 1.48676400  |
| H                      | 0.85881100  | -1.34182400 | 3.09514000  | H  | 3.02506800  | 2.62847000  | 1.51214200  |
| O                      | 0.49117900  | -1.44855400 | 4.01052100  | H  | 0.37559100  | 2.62109000  | 2.56143900  |
| C                      | 1.53808400  | -1.87832700 | 4.84941500  | H  | 2.33599400  | 1.35499800  | 2.51887800  |
| H                      | 2.37311800  | -1.16060100 | 4.89048700  | O  | 0.27173300  | 0.20086700  | 3.01116500  |
| H                      | 1.13988100  | -1.98349400 | 5.86504600  | H  | -0.65857500 | 0.38301400  | 3.21200800  |
| H                      | 1.95015400  | -2.85568300 | 4.54940500  | H  | 0.16955200  | -1.80060000 | 3.59613400  |
| Co                     | 0.05866200  | 0.27141000  | 0.79932000  | C  | 0.73961000  | -0.89935100 | 3.82008800  |
|                        |             |             |             | H  | 1.78657500  | -1.05083100 | 3.57106800  |
|                        |             |             |             | H  | 0.63825300  | -0.62188100 | 4.87054100  |
|                        |             |             |             | Br | -2.89704600 | 6.52853000  | -0.59004800 |
|                        |             |             |             | Br | -4.40758600 | 1.13005100  | 0.31257900  |
|                        |             |             |             | Br | -2.18283300 | -3.83328000 | 2.58728500  |
|                        |             |             |             | Br | -3.79327800 | -4.80781900 | -2.76092100 |
|                        |             |             |             | Br | 3.19244200  | -3.34028400 | -0.34772200 |
|                        |             |             |             | Br | 7.34387100  | 0.52331600  | -0.61362300 |
| [CoL -Br] <sup>0</sup> |             |             |             |    |             |             |             |
| H                      | 1.62394100  | 2.61117800  | -4.40206300 |    |             |             |             |
| H                      | 0.36553600  | 0.69825700  | -3.55837100 |    |             |             |             |
| H                      | -2.11609500 | -2.36066700 | -2.98263700 |    |             |             |             |
| C                      | 1.54019600  | 2.46320400  | -3.33119400 |    |             |             |             |
| C                      | 0.82180600  | 1.37924600  | -2.85129700 |    |             |             |             |
| H                      | 2.71894700  | 4.19781000  | -2.83422900 |    |             |             |             |
| H                      | -0.76536600 | -0.59954500 | -2.60269500 |    |             |             |             |
| C                      | -2.13233000 | -2.63698200 | -1.93458300 |    |             |             |             |
| C                      | 2.15644400  | 3.35337900  | -2.45294400 |    |             |             |             |
